1 **Modeling site-specific nucleotide biases affecting Himar1 transposon insertion frequencies in TnSeq**  
2 **datasets**

3  
4 Sanjeevani Choudhery<sup>1</sup>, A. Jacob Brown<sup>1</sup>, Chidiebere Akusobi<sup>2</sup>, Eric J. Rubin<sup>2</sup>, Christopher M. Sasseti<sup>3</sup>,  
5 and Thomas R. Ioerger<sup>1</sup>

6  
7 <sup>1</sup>Department of Computer Science and Engineering, Texas A&M University, College Station, TX

8 <sup>2</sup>Department of Immunology and Infectious Diseases, Harvard School of Public Health, Boston MA

9 <sup>3</sup>Department of Microbiology and Physiological Systems, University of Massachusetts Medical School,  
10 Worcester, MA

11  
12 Abstract

13 In bacterial TnSeq experiments, a library of transposons insertion mutants is generated, selected under  
14 various growth conditions, and sequenced to determine the profile of insertions at different sites in the  
15 genome, from which the fitness of mutant strains can be inferred. The widely used Himar1 transposon is  
16 known to be restricted to insertions at TA dinucleotides, but otherwise, few site-specific biases have been  
17 identified. As a result, most analytical approaches assume that insertion counts are expected a priori to  
18 be randomly distributed among TA sites in non-essential regions. However, recent analyses of  
19 independent Himar1 Tn libraries in *M. tuberculosis* have identified a local sequence pattern that is non-  
20 permissive for Himar1 insertion. This suggests there are site-specific biases that affect the frequency of  
21 insertions of the Himar1 transposon at different TA sites. In this paper, we use statistical and machine  
22 learning models to characterize patterns in the nucleotides surrounding TA sites associated with high and  
23 low insertion counts. We not only affirm that the previously discovered non-permissive pattern  
24 (CG)GnTAnC(CG) suppresses insertions, but conversely show that an A in the -3 position or T in the +3  
25 position from the TA site encourages them. We demonstrate that these insertion preferences exist in

26 Himar1 TnSeq datasets other than *M. tuberculosis*, including mycobacterial and non-mycobacterial  
27 species. We build predictive models of Himar1 insertion preferences as a function of surrounding  
28 nucleotides. The final predictive model explains about half of the variance in insertion counts, presuming  
29 the rest comes from stochastic variability between libraries or due to sampling differences during  
30 sequencing. Based on this model, we present a new method, called the TTN-Fitness method, to improve  
31 the identification of conditionally essential genes or genetic interactions, i.e., to better distinguish true  
32 biological fitness effects by comparing the observed counts to expected counts using a site-specific model  
33 of insertion preferences. Compared to previous methods like Hidden Markov Models, the TTN-Fitness  
34 method can make finer distinctions among genes whose disruption causes a fitness defect (or advantage),  
35 separating them out from the large pool of non-essentials, and is able to classify the essentiality of many  
36 smaller genes (with few TA sites) that were previously characterized as uncertain.

37

## 38 Introduction

39 TnSeq has become a popular tool for evaluating gene essentiality in bacteria under various  
40 conditions (Cain, Barquist et al. 2020). The most widely used transposons for bacterial TnSeq are those in  
41 the *mariner* family, such as Himar1 (Sasseti, Boyd et al. 2003). To date, it has generally been assumed  
42 that the Himar1 transposon, frequently used to generate the transposon libraries, inserts randomly at TA  
43 dinucleotide sites in non-essential regions across the genome (Lampe, Akerley et al. 1999). The abundance  
44 of transposon insertions at each TA site can be quantified efficiently using next-generation sequencing  
45 (Long, DeJesus et al. 2015). Genes or loci with an absence of insertions are considered to be essential, as  
46 disruption in these regions are not tolerated (Sasseti, Boyd et al. 2003). Genes or loci with a reduced  
47 mean insertion count are considered mutants with growth defects, as disruptions in these regions are not  
48 fatal but cause growth impairments or fitness defects (van Opijnen, Bodi et al. 2009). Genes that have

49 significant changes in mean counts between conditions are deemed as conditionally essential (Gawronski,  
50 Wong et al. 2009).

51           There are several sources of noise in TnSeq experiments, including stochastic variations in the  
52 library generation process as well as instrument and sampling-error in DNA sequencing, resulting in a high  
53 variability in insertion counts. Statistical methods developed thus far to assess gene essentiality typically  
54 assume that insertions occur randomly at TA sites in non-essential regions, and the reason some sites  
55 have more insertions than others is largely due to stochastic differences in abundance in the library.  
56 However, some studies suggest that transposon insertions at non-essential sites is influenced by the  
57 surrounding nucleotides or genomic context. Transposons Tn5 and Mu (not restricted to TA dinucleotides)  
58 showed a bias towards insertions in GC-rich regions and resulted in a less uniform distribution of insertions  
59 in the A-T rich genome (61% AT) of *C. glabrata* than their notably less-biased counterpart Tn7 (Green,  
60 Bouchier et al. 2012). In addition, Lampe (Lampe, Akerley et al. 1999) showed that local bendability of the  
61 DNA strand can affect the probability of Himar1 insertion at different chromosomal locations in *E. coli*.  
62 Furthermore, an analysis of 14 independent transposon libraries in *M. tuberculosis* (Mtb) H37Rv identified  
63 a local sequence pattern around certain TA sites that was non-permissive for Himar1 insertions  
64 (CG)GnTAnC(CG) (DeJesus, Gerrick et al. 2017). This sequence pattern extended to ~9% of sites in non-  
65 essential regions which almost always had counts of zero (DeJesus, Gerrick et al. 2017).

66           In this paper, we use statistical and machine learning models to identify patterns in the  
67 nucleotides surrounding TA sites associated with high and low insertion counts. We discover nucleotide  
68 biases within a  $\pm 4$ -base pair window around the TA site that suppress Himar1 insertions, and other  
69 patterns that appear to select for them (i.e., associated with high insertion counts). We capture these  
70 biases in a predictive model of Himar1 insertion preferences that can be used to predict expected insertion  
71 counts at any TA site as a function of the surrounding nucleotide context. We demonstrate that these  
72 insertion preferences exist in other Himar1 TnSeq datasets from *Mtb*, as well as other mycobacterial and

73 non-mycobacterial species. The final predictive model explains about half of the variance in insertion  
74 counts, presuming the rest comes from stochastic variability between libraries or due to sampling  
75 differences during sequencing. We demonstrate that this model can be used to improve the assessment  
76 of genes' fitness by comparing the observed counts to expected counts using a site-specific model of  
77 insertion preferences.

78

## 79 Results

### 80 **Insertion counts at TA sites are correlated between libraries**

81 Variability in insertion counts at TA sites can be attributed to various sources, including  
82 abundance in library, experimental randomness, and local sequence biases, as well as genuine biological  
83 significance (fitness effects). To attempt to differentiate these, we re-analyzed a previously published  
84 collection of 14 independent Himar1 TnSeq libraries grown in standard laboratory medium (DeJesus,  
85 Gerrick et al. 2017). An extended HMM analysis the 14 datasets (see Methods) suggests that  
86 approximately 11.6% of the organism's TA sites are essential for growth, and insertions in approximately  
87 3.5% of the sites can cause a growth defect. In addition, 9% of sites in non-essential regions have few to  
88 no insertions due to a non-permissive sequence pattern (DeJesus, Gerrick et al. 2017). Insertions at TA  
89 sites in regions other than these are generally expected to occur randomly. If true, the insertion counts at  
90 the same TA site in different libraries would be expected to be uncorrelated on average. However, our  
91 analysis of the 14 H37Rv Tn libraries shows that there is substantial correlation of counts at individual TA  
92 sites, suggesting that some TA sites have a higher propensity for Himar1 insertion than others. Figure 1  
93 shows the distribution of  $\log_{10}$  insertions counts from each library in a genomic region with 75 TA sites  
94 (the log of counts was taken to better fit a Gaussian distribution). Each library was TTR-normalized to  
95 make counts from datasets of different total size comparable (DeJesus, Ambadipudi et al. 2015). Panel A  
96 shows that mean insertion counts differ widely among non-essential TA sites, and the variability between

97 TA sites is more than within each site. Thus, high counts at a TA site in one library tend to have high counts  
98 in other libraries and similarly, sites with low counts occur symmetrically across the libraries. As a  
99 comparison, insertion counts at TA sites (excluding those marked essential or following the non-  
100 permissive pattern) were randomized within each library. Panel B shows the same 75 consecutive TA sites  
101 in this randomized dataset. When randomized, the distribution of counts at sites in non-essential regions  
102 is much more uniform. The average variance of all insertions within a TA site is 0.430, significantly lower  
103 ( $p$ -value  $< 0.001$ ) than the variance of 0.929 found in the randomized dataset. This makes it evident that  
104 the correlation of log insertion counts across libraries is greater than expected. In fact, pairwise  
105 correlations of the randomized datasets range from 0.15 to 0.33, averaging to 0.28. Pairwise correlations  
106 of 14 libraries are considerably higher, ranging from 0.5 to 0.97, averaging to 0.62 (see Supplemental  
107 Figure S1). 80 of the 90 pairwise correlations had significant  $p$ -values ( $< 0.01$ ) from comparison by a two-  
108 tailed  $t$ -test (see Supplemental Table T1). A significant high correlation across libraries suggests there are  
109 site-specific influences, in addition to those previously observed, on insertion probabilities at different TA  
110 sites.

111

## 112 **Modeling Insertion Counts using Linear Regression**

113 To determine whether the nucleotides surrounding a TA site influence the probability of  
114 insertion, we examined the association of proximal nucleotides on insertion counts, averaged over all non-  
115 essential TA sites in the genome. Figure 2 presents evidence of site-specific nucleotide effects that  
116 influence the relative abundance of insertions at TA sites. Panel A shows overall nucleotide probabilities  
117  $\pm 20$  bp from the TA site. Most of the deviation in nucleotide probabilities occurs within 4 bp of the central  
118 TA site, with probabilities varying up to 20% for some nucleotides. Further insight can be gained by  
119 dividing the TA sites into thirds: sites with lowest counts, sites with medium counts, and sites with highest  
120 counts. Panel B, depicting the lowest third of the range of insertion counts, shows an increase in

121 probabilities of nucleotides C and G and a decrease in probabilities of nucleotides ‘A’ and ‘T’ especially at  
122 positions  $\pm 2$  and  $\pm 3$ . Panel D, depicting the highest third of insertion counts, also shows drastic changes in  
123 nucleotide probability, with a notable increase in propensity for ‘A’ at -3 and ‘T’ at +3. These observations  
124 suggest a correlation between the magnitude of insertion counts and nucleotides surrounding TA sites.  
125 Thus, insertion counts at a TA site could be affected by the surrounding nucleotides.

126 We trained a linear regression model on the 40 nucleotides surrounding the TA site (positions -  
127 20...+20) to predict insertion counts in known non-essential regions (67,670 TA sites) using the mean  
128 counts from the 14 libraries of H37Rv. The input to the model was a one-hot-encoding of the nucleotides,  
129 where each nucleotide at each position was represented by 4 bits and concatenated into a bit vector,  
130 totaling 160 binary features. The resulting linear model was:

131 
$$\log_{10}(\text{Insertion Count}) = w_0 + \sum_{i=-20..+20} \sum_{j=A,C,G,T} w_{ij} \cdot \text{nuc}_{ij}$$

132 where  $\text{nuc}_{ij}=1$  if  $\text{nuc}[i] = j$ ,  $\text{nuc}[i]$  is the nucleotide at position  $i$  relative to the TA site and weights  $w_{ij}$   
133 correspond to each of the 160 binary features. This formula is equivalent to a dot-product a 160-bit  
134 vector (plus an intercept) with a vector of weights,  $\log_{10}(\text{Insertion Count}) = w_0 + w_1 \text{b}_{-20=A} + w_2 \text{b}_{-20=C} + w_3$   
135  $\text{b}_{-20=T} + w_4 \text{b}_{-20=G} + \dots + w_{157} \text{b}_{+20=A} + w_{158} \text{b}_{+20=C} + w_{159} \text{b}_{+20=T} + w_{160} \text{b}_{+20=G}$ , where every four bits encode the  
136 nucleotide at a position  $\pm 20$  bp from the TA site. The model was trained and evaluated using 10-fold  
137 cross validation. Figure 3 shows the average correlation between predicted and observed  $\log_{10}$  insertion  
138 counts. The model has some predictive power ( $R^2$  value of 0.32), but also has high variance. A slight bias  
139 can be seen in the figure, where the low counts are predicted too high, and the high counts too low. This  
140 is a consequence of the regression model making predictions that do not span as wide of a range as the  
141 actual data, due to inaccurate predictions for the sites with the most extreme (largest or smallest  
142 counts). The accuracy of predictions made by this initial simplified regression will increase with  
143 improved models (below) and thus this effect will be reduced.

144 In Figure 3B, nucleotides with highest coefficients in the trained model are located within a  
145 window of  $\pm 4$  bp around the TA site. The pattern created by the nucleotides of these coefficients are  
146 consistent with the non-permissive pattern (CG)GnTAnC(CG) previously reported (DeJesus, Gerrick et al.  
147 2017). Nucleotide 'G' has the highest absolute coefficient value in the -2 position and 'C' has the highest  
148 absolute coefficient value in the +2 position. Moreover, both 'C' and 'G' have similarly high absolute  
149 coefficients in the -3 and +3 positions. In addition to the confirmation of the non-permissive pattern (large  
150 negative coefficients for 'G' at -3 and 'C' at +3), the figure shows nucleotides 'A' and 'T' with relatively  
151 high positive coefficients in positions -3 and +3 from the TA site. These patterns reinforce the observations  
152 made in Figure 1 and provide further evidence of previously undetected site-specific nucleotide biases  
153 that affect Himar1 insertion counts.

154

#### 155 **Prediction of insertion counts at TA sites relative to local average counts**

156 We assume that insertion counts are proportional to the permissiveness of a site i.e., a site with  
157 a less permissive pattern will have lower counts than a site with a more permissive pattern. However,  
158 insertion counts are also affected by biological fitness. It is likely that a TA site with a specific nucleotide  
159 pattern in a fitness-defect gene will have a lower insertion count than a TA site with the same pattern in  
160 a non-essential gene. But this effect (decrease or increase in counts) should be shared by multiple TA sites  
161 locally. We can compare the insertion count observed at a site to the observed counts at other TA sites in  
162 the region, the level of which should reflect the general fitness effect of disrupting the gene. Thus,  
163 modeling this relative (or local) change in insertion counts would allow us to factor out biological effects  
164 on counts and focus on the effect of nucleotide patterns on the insertion counts.

165 This change in insertion counts is quantified for every TA site as a log-fold-change (LFC) value.  
166 The local average was calculated for each site by taking the mean insertion counts from the previous 5  
167 and next 5 TA sites from the site of interest (i.e., using a sliding window of 11 consecutive TA sites).

168 
$$LocalAverage(i) = \frac{1}{10} \left[ \sum_{i-5}^{i-1} InsertionCount(i) + \sum_{i+1}^{i+5} InsertionCount(i) \right]$$

169 The local mean excludes the central site itself and any locations marked as essential during pre-processing.

170 The LFC for each TA site was calculated by taking the log insertion count at that site plus a pseudo count  
171 of 10 (to smooth out high variability of LFCs for sites with low counts) and dividing it by the local average:

172 
$$LFC(i) = \log_2 \left( \frac{InsertionCount(i) + 10}{LocalAverage(i) + 10} \right)$$

173 As with the previous model, this linear model was trained and tested using 10-fold cross  
174 validation. The resulting model (see Supplemental Figure S2) has an average  $R^2$  value of 0.38, indicating  
175 that training the model to predict changes in insertion counts (relative to local mean) rather than absolute  
176 insertion counts greatly reduces the noise due to local fitness effects (e.g., in a gene where insertion cause  
177 growth defects, systematically reducing abundance of insertions in the region). This allows the model to  
178 better capture the effect of nucleotides surround TA sites on Himar1 insertion preferences.

179

## 180 **A neural network model explains up to 50% of the variability in insertion counts**

181 As they can capture non-linear patterns, neural networks are considered to be some of the most  
182 powerful predictors in Machine Learning (Rumelhart, Hinton et al. 1986). To see if we could increase the  
183 accuracy of our model, we tried using our data to train a fully connected multi-layer feed-forward Neural  
184 Network. The model contained one hidden layer of 50 nodes. This parameter along with other hyper  
185 parameters of the network were tuned using a grid search (see details in Methods and Materials). A  
186 random subset of 70% of the data was used to find the ideal hyper parameters through cross validation,  
187 with the remaining 30% of the data used to test the final hyper parameters. A 10-fold cross-validation of  
188 the entire dataset was used to train and test the model i.e., judge the model accuracy using our data. The  
189 input to the model consisted of bit-vectors encoding nucleotides surrounding each TA site in the dataset,  
190 totaling to 160 features. The target value was LFCs (log-fold-changes of insertion counts relative to local



191 mean). The model performed better than the previous models with an average  $R^2$  of 0.51 ( $R^2$  of 0.509 on  
192 the hyper parameter test data) (see Supplemental Figure S3). Thus, the neural network can explain around  
193 half of the variability in insertion counts at TA sites based on surrounding nucleotides; presumably, the  
194 remaining differences in counts still reflect stochastic differences in abundance between libraries (or other  
195 influences on TA insertion preferences for which we have not yet accounted). However, as is typical for  
196 neural networks, this model (as a matrix of connection weights) does not provide us much insight into  
197 nucleotide patterns that led to the predictions for the TA sites.

198

### 199 **Certain Nucleotides Surrounding TA Sites are Associated with High or Low Insertion Frequencies**

200 It has been previously noted that there are biases in distributions of nucleotides surrounding  
201 TA sites, making them more permissive or less permissive. If a site has a pattern that is considered more  
202 permissive, it should have a higher insertion count than its neighbors and thus a positive LFC. The opposite  
203 is true for sites with a less permissive pattern. They should have lower counts than their neighbors and  
204 thus negative LFCs. The heatmap in Figure 4 was generated to visualize any additional nucleotide biases  
205 that may result in unusually high or low insertion counts. For each nucleotide N and position P within  $\pm 20$   
206 bp of a TA site, the mean LFC was calculated over the subset of TA sites having nucleotide N at position P  
207 (Methods and Materials). The heatmap reinforces the idea illustrated in [Figure 2](#) of the correlation  
208 between nucleotide biases and insertion count magnitudes. A 'G' in position -2 and its symmetric  
209 counterpart 'C' in position +2, as well as 'C' in the -3 position and its counterpart 'G' in +3 position are  
210 associated with low mean LFCs. This indicates that TA sites with at least one of these nucleotides in their  
211 relative positions tend to have lower insertion counts than their neighbors, consistent with the nucleotide  
212 bias represented by the non-permissive pattern (CG)GnTAnC(CG) observed in (DeJesus, Gerrick et al.  
213 2017). Similarly, there is a distinctive pattern for positive mean LFCs: an 'A' in position -3 and its  
214 counterpart 'T' in position +3 are both associated with higher mean LFCs, and hence can be interpreted

215 as being more permissive for Himar1 insertions (associated with increased counts). However, the effects  
216 of multiple biases appearing in a single sequence are not additive. For instance, a 'C' in the -2 and an 'A'  
217 in the -3 position do not "cancel" each other out; they are interdependent. We quantify how effects like  
218 these combine in the tetra-nucleotide model below.

219           There appears to be a slight periodic pattern of the G and C nucleotides surrounding the TA site,  
220 between 20 and 4 bp from the TA site in Figure 4 (also evident in Figure 2). The nucleotides show an  
221 increase in mean LFC for every third position in the sequence. Representing this pattern in a simplistic  
222 manner and comparing it to the LFC target variable showed little correlation. Thus, this periodic sequence  
223 was not incorporated in our model.

224

#### 225 **Symmetric Tetra-nucleotide Linear Model (STLM)**

226           To gain more insight into the nucleotide patterns observed through the heatmaps, we  
227 devised a variant of the linear model, called the STLM (Symmetric Tetra-Nucleotide Linear Model). In the  
228 linear models previously mentioned, the pattern associated with individual nucleotide was implicitly  
229 assumed to be additive, and thus each nucleotide position was treated as an independent variable. But  
230 we wondered whether a stronger pattern may be found through combinations of these nucleotide  
231 positions, which can represent non-linear interactions.

232           Training the linear model to predict LFCs based only on the nucleotides in a window of  $\pm 4$  bp  
233 from the TA site yielded nearly identical results to the regression predicting LFCs using all 40 nucleotides  
234 ( $R^2 = 0.35$  and the same coefficient pattern for nucleotides in range -4...+4) indicating that most of the  
235 influence on LFC predictions is within an 8 bp window (see Supplemental Figure S4). This is reinforced by  
236 the heatmaps, as a majority of the apparent effects occur within 4 bp from the TA site. If we use all the  
237 sequence combinations of the nucleotides in positions -4...+4 as features in our model, we will have  $4^8$   
238 =65,536 features (i.e., terms in a linear model, or inputs to a neural network). However, the patterns of

239 nucleotide biases are symmetrical (reverse-complement), as shown by the heatmaps, thus making the  
240 distinction between all 8 nucleotides unnecessary. The four nucleotides upstream of the TA appear to  
241 affect the insertion counts in the same way as the reverse-complement of the 4 nucleotides downstream  
242 of the TA site. Therefore, it is only necessary to capture the association of 4 nucleotides at a time on LFCs  
243 in the model. Hence, we shift to training our models based on combinations of 4 nucleotides, i.e., tetra-  
244 nucleotides, which reduces the number of features in our model to  $4^4 = 256$ .

245 As input to the STLM, each TA site is represented as a vector where all features are set to 0  
246 except for the upstream tetra-nucleotide and reverse-complemented downstream tetra-nucleotide (see  
247 Figure 6). This is essentially the same as adding two bit-vectors, one vector with the bit for the upstream  
248 tetra-nucleotide on and another separate vector with the bit for the downstream tetra-nucleotide on. The  
249 result is a sparse 256-bit vector with only 2 bits on (except when the two tetra-nucleotides are the same,  
250 in which case the single feature value for the tetra-nucleotide is set to 2). The result is a linear model that  
251 follows the equation

$$252 \quad LFC = intercept + w_1 b_{AAAA} + \dots + w_{256} b_{TTTT},$$

253 where  $w_1 \dots w_{256}$  are the weights associated with tetra-nucleotides (to be trained by the model) and  
254  $b_{AAAA} \dots b_{TTTT}$  are the bits corresponding to the presence of the adjacent tetra-nucleotide features for  
255 every TA site. Encoding both the upstream and reverse-complemented downstream tetra-nucleotides  
256 allows us to use the same model to represent the bias from both sides of the TA simultaneously as  
257 independent features, additively contributing equal weight. Assume for a given TA site, both upstream  
258 and downstream tetra-nucleotides are associated with high LFCs; then they will reinforce to predict an  
259 even higher insertion count for that site. But if the upstream tetra-nucleotide has a trend to contribute a  
260 high LFC and the reverse-complemented downstream tetra-nucleotide has a trend to contribute a low  
261 LFC, they will tend to cancel each other out.

262 As seen in Figure 5A, 10-fold cross validation using the H37Rv data resulted in an average  $R^2$   
263 value of 0.469. This  $R^2$  value is slightly lower than, but nearly equal to, that of the neural network ( $p$ -value  
264  $< 0.01$  from two-tailed  $t$ -test). However, the STLM provides us more insight into patterns contributing to  
265 the prediction of the LFCs. In a regression with these tetra-nucleotide features, we expect each coefficient  
266 (i.e., weights) of the model to correlate with the average LFC associated with each tetra-nucleotide (over  
267 TA sites surrounded by these tetra-nucleotides). Figure 5B shows the relationship of the STLM coefficients,  
268 and the mean observed LFCs of the corresponding tetra-nucleotides (shifted on the  $y$ -axis by the bias  
269 (intercept) in our data). The strong linear trend visible adheres to the expectation of a high correlation  
270 and indicates our model accurately represents our data. The individual tetra-nucleotide coefficients are  
271 shown in Panel C, sorted in decreasing order (See Supplemental Table T4 for full table). Consistent with  
272 the patterns observed in the heatmaps in Figure 4, the bottom ten features associated with low  
273 coefficients (predictive of low mean LFCs) all have a 'G' in the 2nd position upstream of the TA sites and a  
274 'C' or 'G' in the 3rd position. The features associated with the top ten coefficients, thus higher LFC values,  
275 all have an 'A' in 3rd position upstream from the TA site. However, the strength of the STLM is that it  
276 accounts for combinations of 4 nucleotides together at a time, resolving cases where single-nucleotide  
277 patterns might conflict.

278 While the STLM was able to partially predict the frequency of insertion at different TA sites  
279 ( $R^2=0.47$ ), a significant amount of variability remains between observed and predicted insertion counts.  
280 This can be attributed to stochastic variability in the insertion counts across the libraries, as well other  
281 factors that the model did not account for, such as GC content outside of the -4...+4 region and DNA  
282 bendability (Lampe, Grant et al. 1998). However, when the STLM was augmented with the addition of GC  
283 content as a feature, where GC content was calculated with the  $\pm 20$  bp window, it only showed an  
284 improvement in  $R^2$  of 0.02. When the STLM was augmented with bendability as an additional feature,  
285 calculated for each TA site using the *bend-it* program (Goodsell and Dickerson 1994), the results were

286 nearly identical to that of the model with only the 256-bit vectors ( $R^2=0.47$ ). These experiments indicated  
287 that the tetra-nucleotides are a larger factor in the prediction of LFCs than GC content or bendability.  
288 Using only the GC content and bendability as two features to a linear model resulted in a  $R^2$  of nearly zero  
289 for all the datasets tested. Furthermore, plots of LFC vs. bendability and LFC vs. GC content showed little  
290 to no correlation.

291

### 292 **Application of STLM to other Himar1 TnSeq datasets**

293 To evaluate whether the nucleotide biases derived from these 14 independent datasets in  
294 H37Rv are representative of generalized insertion preferences of the Himar1 transposon, we compared  
295 the biases seen so far to those in other Himar1 TnSeq datasets.

296 Staying within the *Mycobacterium* genus, we obtained datasets from Himar1 TnSeq libraries,  
297 grown in regular growth medium (7H9), of *M. avium* (Dragset, Ioerger et al. 2019), *M. abscessus* ATCC  
298 19977 (Akusobi et.al, <https://www.biorxiv.org/content/10.1101/2021.07.01.450732v1>), *M. smegmatis*  
299 mc<sup>2</sup> 155  $\Delta$ LepA (unpublished data, E.J. Rubin), and *M. tuberculosis* H37Rv  $\Delta$ Rv0060 (Zaveri, Wang et al.  
300 2020). We extracted the LFCs from the datasets based on the insertion counts at TA sites in each genome  
301 along with tetra-nucleotide vectors based on the nucleotides surrounding each TA site. The heatmaps for  
302 each of the datasets in Figure 7 shows the mean LFCs associated with each nucleotide at each position  
303 within a  $\pm 20$ bp window of the TA Site. These heatmaps look nearly identical to the heatmap of H37Rv in  
304 Figure 4. They exhibit the same negative LFC bias for -3 'C', +3 'G', -2 'G', +2 'G', and the same -3 'A', +3 'T'  
305 positive LFC bias. STLM LFC predictions for each of the new Tn-Seq datasets were adjusted by a simple  
306 regression-based procedure to correct for differences in the LFC distribution (further described in  
307 Methods). Results, calculated as correlations between predicted and observed LFCs with the regression  
308 adjustment (see Supplemental Figure S6), along with the nucleotide biases observed in the heatmaps,  
309 show that the STLM can help explain the variability in insertion counts at different TA sites for these

310 datasets (using coefficients trained on *M. tuberculosis* H37Rv data but applied to datasets from other  
311 mycobacterial species). The predictive power of our model on the *M. abscessus* dataset ( $R^2$  of 0.504) is  
312 slightly higher than, but about the same as, the Mtb test set. Thus, we can explain ~50% of the variance  
313 in insertion counts in this dataset based on the nucleotide biases. The predictive power of our model on  
314 some datasets, such as *M. avium* was lower ( $R^2$  of 0.262), but they still exhibited a correlation between  
315 observed and predicted LFCs (and hence insertion counts) and displayed a nucleotide pattern similar to  
316 the heatmaps from the other mycobacterial TnSeq datasets.

317           To examine whether these biases also occur outside of the *Mycobacterium* genus, we obtained  
318 Himar1 TnSeq datasets from *Caulobacter crescentus* (Murray, Panis et al. 2013), *Rhizobium*  
319 *leguminosarum* (Perry, Akter et al. 2016), and *Vibrio cholera* (Chromosome I only; Chromosome II behaves  
320 similarly) (Chao, Pritchard et al. 2013). We calculated LFCs (log-fold-change of insertion counts relative to  
321 local mean) at each TA site in these genomes and plotted the heatmaps as associations of nucleotides at  
322 specific positions around the TA with LFCs. As Figure 8 shows, the heatmaps associated with all three  
323 datasets reflect the same nucleotide patterns found in the mycobacterial datasets. Applying the STLM to  
324 these datasets yielded significant correlations between predicted and observed LFCs, with statistically  
325 significant  $R^2$  values (see Supplemental Figure S7). The correlation for *Vibrio cholera* is lower than the  
326 others ( $R^2= 0.249$ ) possibly due to sequence preferences in the fragmentase used for shearing during the  
327 sample prep for sequencing. This was done differently than other TnSeq experiments and could have  
328 introduced additional variance into the insertion counts for the *Vibrio* dataset. However, the heatmap  
329 shows a pattern consistent with the nucleotide biases we see with the Tn-Seq datasets from other  
330 organisms. This indicates that the nucleotide biases visible in the mycobacterial datasets also explains  
331 some of the insertion count variances present in non-mycobacterial datasets, thus supporting that the  
332 STLM captures generalized site-specific biases on insertion preferences of the Himar1 transposon.

333

334 **SNPs around TA sites in an *M. abscessus* Clinical Isolate Exhibit Predictable Changes in Insertion Counts.**

335 To evaluate whether changes in nucleotides proximal to TA sites would have a predictable effect  
336 on transposon insertion counts, we obtained a Himar1 Tn library for a clinical isolate of *M. abscessus*  
337 Taiwan49 (*Mab* T49) and compared it to a Tn library in the reference strain, ATCC 19977 (generated by  
338 methods described in the accompanying manuscript by Akusobi et al.  
339 <https://www.biorxiv.org/content/10.1101/2021.07.01.450732v1>; see Availability for data files with raw  
340 insertion counts). These two strains of *M. abscessus* are fairly divergent, belonging to different subspecies  
341 (ATCC 19977 in *Mab subsp. abscessus*, and Taiwan49 in *Mab subsp. massiliense*); they have 114,335 SNPs  
342 between them based on a genome-wide alignment. However, at the level of functional genomics, they  
343 are similar. As determined through the HMM method in TRANSIT (DeJesus, Ambadipudi et al. 2015), 513  
344 out of 4923 total genes in ATCC 19977 and 451 out of 4225 total genes in T49 are predicted to be essential or  
345 growth defect genes. 417 of these genes overlap. Figure 9 shows that predicting insertion counts in this  
346 isolate with the STLM yielded an  $R^2$  value of 0.49. This is, as expected, quite similar to the results of the  
347 *M. abscessus* reference dataset reported above. After aligning the genomes *M. abscessus* Taiwan49  
348 clinical isolate and *M. abscessus* reference strain, we found 9303 TA sites where there was exactly one  
349 SNP in the 8-nucleotide window ( $\pm 4$  bp) surrounding the TA site.

350 A plot of the average changes in observed LFCs versus the average changes in predicted LFCs  
351 between the reference and isolate strain at these sites for every TA site with an adjacent SNP can be seen  
352 in Figure 10 (see Methods and Materials). We expected that when a nucleotide with a high negative bias  
353 was mutated, the observed LFC would increase, and when a nucleotide with a high positive bias was  
354 changed, the observed LFC would decrease. [Figure 10](#) shows this effect. The colored points in the graph  
355 are the most significant nucleotide-position pairs that we have previously observed to have the highest  
356 LFC biases. When a nucleotide is switched from an 'A' in -3 position (blue) or a 'T' in the +3 position (green)  
357 to any other nucleotide, there is a decrease in observed LFC and when a 'G' in -2 position (orange) or 'C'

358 in +2 position (pink) is changed, there is an observed increase. The presence of this effect of SNPs on the  
359 LFC i.e., differences in insertion counts at corresponding TA sites in different clinical isolates, along with  
360 the high correlation of the observed and predicted LFC changes, provides further evidence that the STLM  
361 can represent the nucleotide biases on transposon insertion preferences with high accuracy.

362 The accompanying table in Figure 10 is a truncated view of the SNPs sorted in increasing order  
363 of mean observed LFC change (for full table see Supplemental Table T2). In addition to the general pattern  
364 observed in the plot, we see that the magnitudes of the LFC differences correspond to the magnitudes of  
365 nucleotide biases. In the previous heatmaps, 'A' in the -3 position (and the downstream reverse  
366 complemented pattern) shows the strongest bias for high LFCs and 'C' in the -3 position or 'G' in -2 position  
367 (and the downstream reverse complemented pattern) shows the strongest bias towards low LFCs.  
368 Following this pattern, the biggest decrease in mean observed LFC, occurred when an 'A' in the -3 position  
369 was changed to a 'C' and the biggest increase in mean observed LFCs occurred when 'C' in the -3 position  
370 was changed to an 'A'. Thus, the effect of SNPs between a pair of moderately divergent strains correspond  
371 to the nucleotide biases observed within various Himar1 datasets and furthers the notion that these  
372 biases are general and can explain a significant portion of the variance in insertion counts of Himar1 Tn-  
373 Seq datasets.

374

### 375 **Using Expected Insertion Counts to Improve Gene Essentiality Predictions**

376 Previous methods of identifying essential genes within individual datasets have been based on  
377 the magnitude of insertion counts. For example, tools such as TnSeq-Explorer (Solaimanpour, Sarmiento  
378 et al. 2015) use the mean of insertion counts in sliding windows to classify genes by essentiality. The  
379 limitation of relying on raw insertion counts is that they can be highly variable among TA sites, and this  
380 noise can lead to inaccurate estimation of the relative level of fitness defects caused by transposon  
381 disruption. We describe a new method, called the TTN-Fitness method using the Gene+TTN model, which



382 considers the site-specific biases on Himar1 insertion preferences to correct the observed counts for  
383 expectations based on the nucleotides surrounding each site.

384 The Gene+TTN model incorporates nucleotide context into an insertion count based model,  
385 allowing us to decouple the two main causes for low insertion counts: biological, and Himar1 insertion  
386 preferences. This allows us to make a more informed assessment on the level of gene fitness defect for  
387 biological reasons. The input to the model for each TA site is a vector consisting of a binary encoding of  
388 the gene in which it is located, combined with the 256 tetra-nucleotide (TTN) features. Each TA site is  
389 represented as a bit vector, with 3981 features, one for each gene, and 256 features encoding the  
390 upstream and reverse-complemented downstream tetra-nucleotides adjacent to the site. We excluded  
391 TA sites from genes determined to be 'Essential' through the Gumbel analysis and Bernoulli Distribution.  
392 The model can be represented in matrix form as:

$$393 \quad Y = b + CG + DT \quad (M_1)$$

394 where Y is a vector of the log10 of insertion counts at every TA site, G is the matrix of 3981 gene covariates  
395 for each site, C is vector coefficients to be fit per gene, T is the matrix of 256 tetra-nucleotide covariates  
396 for each site and D is the vector of coefficients to be fit per tetra-nucleotide. The intercept b is close to  
397 the global average of log10 insertion counts and the coefficients (C) for every gene reflect the deviation  
398 of the gene's mean log10 insertion count from the global average, adjusting for the effect of surrounding  
399 nucleotides (D). Essentially, we are finding the deviation of the gene's mean insertion count from the  
400 global average based on biological reasons, i.e., subtracting out the effect of site-specific nucleotide based  
401 Himar1 insertion preferences. Thus, the gene-specific coefficients (C) represent adjusted estimates of the  
402 fitness level of each gene.

403 The regression model was trained on the *Mtb* H37Rv in-vitro dataset. The significance of genes  
404 (i.e. p-value) was calculated using a Wald test (Draper and Smith 1998), and then adjusted for multiple  
405 testing to limit the False Discovery Rate (FDR) to  $\leq 5\%$  using the Benjamini-Hochberg method (Reiner,

406 Yekutieli et al. 2003). Genes with an adjusted p-value  $< 0.05$  and negative coefficient are interpreted as  
407 ‘Growth Defect’ (GD) genes, and those with adjusted p-value  $< 0.05$  and positive coefficient are  
408 interpreted as ‘Growth Advantaged’ (GA) genes. Genes with an insignificant coefficient near 0 (adjusted  
409 p-value  $> 0.05$ ) are interpreted as ‘Non-Essential’ (NE). Genes identified a priori as essential by the Gumbel  
410 method in TRANSIT (DeJesus, Ambadipudi et al. 2015) were marked ‘Essential’ (ES) by the TTN-Fitness  
411 method and excluded from both training and testing. Gumbel identifies large essential genes well but  
412 tends to classify small genes (with  $< 10$  TA sites) as ‘Uncertain’, depending on the overall level of saturation  
413 of the dataset. Thus, we use the Bernoulli distribution to classify additional significant genes ( $p < 0.05$ )  
414 lacking insertions that are likely essential as ‘Essential-B’ (ESB, as a subcategory of ES) (see Methods and  
415 Materials). The HMM+NP model, a modified HMM to account for non-permissive sites described by  
416 DeJesus (DeJesus, Gerrick et al. 2017), distinguishes between ‘ES’ and ‘ESD’ (Domain-Essential) genes,  
417 which our model does not. For model comparison, we have combined the two categories into one labeled  
418 ‘ES/ESD’. As seen in Figure 11A, the TTN-Fitness method labels a similar number of genes essential as the  
419 HMM-NP method, though slightly fewer non-essential and more in the growth-defect and growth-  
420 advantaged categories (DeJesus, Gerrick et al. 2017). The confusion matrix in Figure 11B shows that there  
421 are 345 genes labeled ‘Essential’ in both the TTN-Fitness method and the HMM+NP model (i.e. on the  
422 diagonal in the confusion matrix), showing a great deal of overlap. 1777 ‘Non-Essential’ genes also overlap  
423 between the 2 methods. However, the biggest difference is that large number of genes labelled as ‘Non-  
424 Essential’ (NE) by the HMM get reclassified as either ‘GD’ or ‘GA’ by the TTN-Fitness method. 14.7% of  
425 genes labeled ‘Non-Essential’ in the HMM+NP model have slightly lower than average insertion counts  
426 and are classified as ‘GD’ via the Gene+TTN ( $M_1$ ) model. 25.4% of genes labeled ‘Non-Essential’ by the  
427 HMM+NP model have insertion counts slightly higher than average and are classified as ‘GA’ through the  
428 Gene+TTN ( $M_1$ ) model. This shows that the TTN-Fitness method labels genes similarly to the HMM+NP

429 model for the most part, but is more sensitive to deviations from the average insertion count and  
430 consequently labels some genes more specifically as ‘GD’ or ‘GA’.

431 Figure 12A shows a linear relationship between the coefficients associated with tetra-  
432 nucleotides features in the Gene+TTN ( $M_1$ ) model and the corresponding coefficients of the STLM,  
433 illustrating that the influence of tetra-nucleotides on predicted counts captured in this model is consistent  
434 with the effect previously discussed in the STLM. Panel B shows the difference in the fitness assessment  
435 of genes when compared to a Gene-Only ( $M_0$ ) model, dropping the TTN features and hence lacking the  
436 site-specific adjustments based on tetra-nucleotide covariates. The Gene-Only ( $M_0$ ) model encodes only  
437 the gene at every TA site and can be expressed in matrix form as:

$$438 \quad Y = b + CG \quad (M_0)$$

439 The intercept ( $b$ ) is the global average log<sub>10</sub> insertion count in the genome and the coefficient  $C$   
440 corresponding to each gene is the deviation of the gene’s mean insertion count from the global average.  
441 As this model does not incorporate the tetra-nucleotides, if there is a gene with a very negative coefficient,  
442 it will be interpreted to be ‘Growth Defect’ regardless of whether the suppression of insertions is due to  
443 true biological gene defect or nucleotide bias. The scatterplot of the gene coefficients between the two  
444 models in Panel A shows a strong linear trend, indicating estimated mean (log<sub>10</sub>) insertion counts for  
445 most genes are quite similar between the two models. However, the dispersion suggests that taking the  
446 nucleotide context into account changes the fitness estimate for a number of outlying genes. Genes that  
447 show the highest differences in coefficients between the two models are frequently labeled as ‘Uncertain’  
448 by the HMM+NP model (DeJesus, Gerrick et al. 2017), a majority of which are small genes with fewer than  
449 5 TA sites. Details on the difference in the coefficients and their significance (determined through a  
450 Student t-test and an FDR adjusted p-value) can be found in the Supplemental Table T3.

451 An example of a gene whose fitness interpretation is changed via the Gene+TTN model in the  
452 TTN-Fitness method (compared to Genes-only model), to better reflect its biological significance, is

453 Rv0833 (PE\_PGRS13). The gene is seen in [Figure 12B](#) is interpreted as ‘Growth Defect’ through model  $M_0$   
454 (Genes-only;  $C = -1.02$ , adjusted p-val =  $2.95 \times 10^{-6}$ ) and as ‘non-essential’ by model  $M_1$  (Gene+TTN;  $C =$   
455  $-0.26$ , adjusted p-value = 0.109, hence not significantly different from 0). The difference in labeling  
456 indicates that, based on the surrounding nucleotides, the low insertion counts at TA sites in Rv0833 are  
457 expected. This is supported by the fact that the PE\_PGRS genes are especially GC-rich (Gey van Pittius,  
458 Sampson et al. 2006). The gene contains 12 TA sites spanning 2250 base pairs. 81.3% of the nucleotides  
459 were ‘G’s or ‘C’s and 6 sites contained the non-permissiveness pattern. Thus, observed insertion counts  
460 in the gene are much lower than the global average insertion count, but they are expected to be. Although  
461 studies suggest that genes within the PE/PPE family may be involved in inhibition of antigen processing in  
462 hosts, PE\_PGRS genes have been shown to be non-essential in-vitro (Gey van Pittius, Sampson et al. 2006).  
463 Thus, the Gene+TTN model was able to evaluate the fitness of PE\_PGRS13 more accurately than the Gene-  
464 Only model, demonstrating that incorporating the nucleotide context surrounding each TA site improves  
465 the fitness assessment of this gene.

466 To investigate genes that exhibit large differences in fitness assessment between the TTN-  
467 Fitness method and the HMM+NP method, Figure 13 shows a volcano plot of the gene coefficients from  
468 the Gene+TTN model versus the  $-\log_{10}$  of the FDR-adjusted p-value. The gray points in the plot are gene  
469 coefficients that were not seen to significantly deviate from 0. These are interpreted as ‘non-essential’  
470 genes by the TTN-Fitness method. The genes that were found to be significant are colored according to  
471 their labels in the HMM+NP model. The vertical solid line at  $C=0$  is where the colored genes on the left  
472 are interpreted as ‘GD’ and colored genes on the right are interpreted as ‘GA’ by the TTN-Fitness method.  
473 All significant genes labeled ‘GA’ or ‘GD’ by the HMM+NP model fall on their respective sides of the  $C=0$   
474 line, but there are a few ‘non-essential’ and ‘Uncertain’ genes that are reclassified by the TTN-Fitness  
475 method.

476           With improvements in fitness assessment from the incorporation of tetra-nucleotides, small  
477 genes (3 or less TA sites) labeled “Uncertain” by the HMM+NP model can be evaluated with greater  
478 confidence. Of the 71 genes labeled “Uncertain” by the HMM+NP model, most (65) have 3 or fewer TA  
479 sites, indicating the uncertainty comes from the short length of the gene. These genes are all concretely  
480 classified by the TTN-Fitness method (mostly as ‘Non-Essential’ (51) or ‘Growth-Defect’ (18); see Figure  
481 11B) .Rv3461c (*rpmJ*, 50S ribosomal protein L36), a gene with 3 TA sites, is an example of such an  
482 “Uncertain” gene (DeJesus, Gerrick et al. 2017). The gene is seen in Figure 12B to be interpreted as ‘Non  
483 Essential’ by the Gene-Only model  $M_0$  ( $C = -0.87$ , adjusted p-val = 0.074, not significantly different from 0)  
484 and ‘Growth Defect’ by the Gene+TTN ( $M_1$ ) model ( $C = -1.02$ , adjusted p-val =  $9.41 \times 10^{-4}$ ), indicating the  
485 insertions for the genes are lower than expected according to the surrounding tetra-nucleotides. Figure  
486 13 shows that the gene is similar to other genes labeled ‘Growth defect’ or ‘Essential’ by the HMM+NP  
487 model. Rv3461c is a part of the L3P family of ribosomal proteins. Other genes in this family have been  
488 labeled as ‘Essential’ or ‘Growth Defect’ by the HMM+NP model and ‘Growth Defect’ per the Gene+TTN  
489 model. In fact, *rpmJ* was categorized as a ‘Growth Defect’ gene in early TraSH experiments (Sasseti, Boyd  
490 et al. 2003). Therefore, this previously ‘Uncertain’ gene should be interpreted as ‘Growth Defect’ (possibly  
491 even ‘Essential’), as the TTN-Fitness method suggests, with confidence.

492           These examples show the improvement of fitness assessment with the incorporation of tetra-  
493 nucleotides in an insertion-count only model. This enables the TTN-Fitness method to account for the  
494 effect of genomic context on the Himar1 transposon insertion preferences, and thus better assess a gene’s  
495 fitness defect due to genuine biological causes.

496

## 497 Discussion

498           Previous studies have demonstrated the presence of some site-specific biases on Himar1  
499 transposon insertion preferences based on a non-permissive pattern that exists around TA sites with low

500 insertion counts in non-essential regions (DeJesus, Gerrick et al. 2017). This led us to hypothesize that  
501 perhaps insertion counts at different TA sites could be predicted based on surrounding nucleotides. We  
502 developed a model that captures nucleotide biases and uses them to predict changes in relative insertion  
503 counts i.e., LFCs. The LFC metric compares raw counts at a site to the local average, which allows us to  
504 predict the deviation in insertion counts from the neighborhood rather than the absolute insertion counts  
505 themselves. This method allows us to examine just the effect of the nucleotides on the insertion counts,  
506 independent of biological effects (e.g., genes with different levels of growth defect). The STLM developed  
507 for the task incorporated tetra-nucleotides upstream and downstream of the TA site, taking advantage of  
508 the symmetric nature of the bias patterns observed in the heatmaps. Furthermore, the tetra-nucleotide  
509 features ensured that the model could capture non-linear combinations (interactions) of nucleotides  
510 proximal to the TA site, not just incorporating the effects of individual nucleotides in an additive way. The  
511 STLM statistically performed as well as the neural network, and in addition was able to provide further  
512 insight into nucleotide patterns that influence insertion counts.

513         The coefficients of the trained STLM showed that there was a pattern of insertion count  
514 suppression consistent with the non-permissive pattern previously observed (DeJesus, Gerrick et al.  
515 2017). In addition, a pattern of increased insertion counts in the presence 'A' in the -3 position or 'T' in  
516 the +3 position was also visible. But the linear model represents these patterns in a more general way so  
517 that they can be used to predict expected insertion counts at any TA site, conditioned on the surrounding  
518 nucleotides. These nucleotide biases were able to explain up to ~50% of insertion count variance in the  
519 other Himar1 datasets. These site-specific nucleotide biases were observed in a variety of TnSeq datasets  
520 from other mycobacterial and non-mycobacterial species. Comparing TA sites with substitutions in the  $\pm 4$   
521 bp window between two divergent strains of *M. abscessus* showed changes in observed LFCs that  
522 corresponded to nearby SNPs as predicted by the STLM, providing further evidence of the generality of  
523 these biases.

524           There is a precedent for transposons in some families having insertion biases for certain sequence  
525 patterns. For example, even though the Tn5 transposase can insert anywhere in a genome, it tends to  
526 insert in GC-rich regions (Goryshin and Reznikoff 1998) (Green, Bouchier et al. 2012). Furthermore, a  
527 detailed pattern analysis applied to known Tn5 insertion sites suggested that the consensus pattern for  
528 preferred target sites is A-GNTYWRANC-T (Goryshin, Miller et al. 1998). Tc1 (also in *mariner* family) was  
529 shown to weakly prefer inserting at TA sites with this consensus pattern: CAYATARTG (Korswagen, Durbin  
530 et al. 1996). The pattern included a coupled symmetric target site preference of an ‘A’ in position -3 and  
531 a ‘T’ in position +3, consistent with our model. We were able to identify similar sequence-dependent  
532 patterns and quantify them in a more general way with a model that can predict expected insertion counts  
533 for every TA site.

534           Early studies in *E. coli* suggested that the Himar1 transposon tends to insert at TA sites in more  
535 “bendable” regions of the genome (Lampe, Grant et al. 1998), as measured experimentally. Bendability is  
536 a cumulative effect of specific nucleotides on local geometric parameters of the DNA helical axis; each  
537 nucleotide makes a small contribution, on the order of a few degrees, to angular distortion (bend, roll,  
538 tilt) of the axis, with different nucleotides (or combinations of nucleotides) having a different effect. This  
539 can accumulate over tens of nucleotides to produce a macroscopic bend or kink in the DNA. Goodsell and  
540 Dickerson (Goodsell and Dickerson 1994) parameterized the geometric effects for each trinucleotide and  
541 used this to generate a model which can be used to predict the bend and twist of the helical axis  
542 accumulated locally using a sliding window. It was speculated that local bendability could facilitate the  
543 melting of the double-helix, recognition/binding of the transposase, and formation of the pre-cleavage  
544 complex (Lampe, Grant et al. 1998). However, while it is possible that bendability contributes weakly to  
545 Himar1 insertion preferences, the effect likely spans a larger window of nucleotides than just  $\pm 4$  bp around  
546 the TA sites; local bendability is not likely to be substantially affected by the 4 nucleotides on either side  
547 of the TA sites, which have a predominant influence according to our statistical analysis. In addition, we

548 computed this around the TA sites in our dataset and added it as a covariate in our linear models, but it  
549 did not improve the performance of the models.

550         The patterns of nucleotide biases on Himar1 transposon insertion preferences may have emerged  
551 as a result of the physical interaction between the Himar-1 transposase and the DNA. Figure 14 displays  
552 the X-ray crystal structure of the complex between the Mos1 transposon (also in the *mariner* family) and  
553 the pre-cleavage state of the DNA double helix (Dornan, Grey et al. 2015). As expected, the components  
554 of the TA dinucleotide (T57, A58) interact with the protein (residues 119-124 (WVPHEL)-orange).  
555 However, the 4 adjacent nucleotides also make extensive contact with the protein in a small tunnel by  
556 packing against Asp284-His293 (green). Arg118 likely makes charged-polar interactions with the  
557 nucleotides at position -2 and -3. These positions are where different nucleotides proximal to TA  
558 dinucleotides are observed to have insertion biases in Himar1 datasets. The interactions between these  
559 TA-adjacent nucleotides and amino acid side chains in the transposase could influence the energetics and  
560 therefore the frequency of successful transposon reactions at TA sites. While it would be tempting to try  
561 to perform a detailed analysis of the hydrogen-bonding and other molecular interactions between  
562 nucleotides in the DNA fragment and amino acid side-chains of the transposase they contact to derive a  
563 structural explanation for the observed preferences for certain nucleotides surrounding the TA site, it  
564 must be remembered that this structure is of Mos1 (whose insertion biases are unknown, except for TA  
565 restriction), and a detailed analysis of molecular interactions relevant to the biases of the Himar1  
566 transposase, as we have characterized, will have to await determination of an X-ray crystal structure of a  
567 complex of the Himar1 transposase bound to a target DNA fragment (containing a TA site).

568         We demonstrated the utility of our model of nucleotide biases on Himar1 insertion frequencies  
569 by using it to improve gene essentiality predictions via the TTN-Fitness method. One way to determine  
570 the essentiality of a gene is to take the average count of insertions at all the TA sites in the gene, and  
571 determine the essentiality based on a set of cutoffs (Zomer, Burghout et al. 2012). This method treats all



572 TA sites as being equivalent a priori (i.e., as independent, and identically distributed observations, with  
573 equal prior probability of insertion), and does not allow for site-specific differences that can greatly affect  
574 the insertion count at each site. Incorporating these surrounding nucleotides takes out (or corrects for)  
575 the effect of insertion biases and focuses the analysis on true biological effects, thus increasing our  
576 certainty in fitness calls for these genes. In the TTN-Fitness method, we fit a linear model to the insertion  
577 counts at TA sites, incorporating the gene in which it resides and the surrounding nucleotides each site as  
578 covariates. The coefficients associated with genes in the regression model reflect how much the mean  
579 insertion counts in the gene deviate from the global average, after correcting for the expected insertion  
580 counts at each site in the gene. For most genes, predicted fitness did not change substantially between  
581 the ablative Genes-only model and the Gene+TTN model of the TTN-Fitness method. However, the  
582 assessment for some notable genes did change with the inclusion of tetra-nucleotide features. PGRS13  
583 was implied to be a 'Growth Defect' gene by the previous insertion count based methodology due to the  
584 low insertion counts at its TA sites. However, sites in the gene are surrounded by mostly 'G's and 'C's  
585 which have been determined by Himar1 preferences to suppress insertions. So, the insertions are low,  
586 but are expected to be low, and thus the gene is determined to be less essential than previously predicted.  
587 The Gene+TTN model used in the TTN-Fitness method has an advantage for small genes with less than or  
588 equal to 3 TA sites (220 in H37Rv genome) such as Rv3461c (*rpmJ*), previously undetermined by  
589 essentiality estimates. The model is less susceptible to noisy counts (high or low) at individual sites  
590 because we can compare the observed counts at those sites to expected counts from their nucleotide  
591 context, correcting for the effect of insertion biases, and thus improving the identification of conditionally  
592 essential genes and genetic interactions, i.e., to better distinguish true biological fitness effects by  
593 comparing the observed counts to expected counts using a site-specific model of insertion preferences.  
594 This method could also be helpful for analyzing differences in essentiality of genes between different  
595 strains (e.g. clinical isolates), where the TTN-Fitness model can correct for expected counts at TA sites to

596 account for differences in the surrounding nucleotides (e.g. due to the different genetic backgrounds of  
597 the libraries).

598

## 599 Methods and Materials

### 600 **Dataset of 14 independent Himar1 insertion libraries of *M. tuberculosis* H37Rv grown in vitro**

601 We obtained 14 independent TnSeq libraries in *M. tuberculosis* H37Rv previously analyzed  
602 (DeJesus, Gerrick et al. 2017), representing a combined total of 35,314,576 independent insertion events  
603 by the Himar1 transposon. All libraries were treated uniformly, grown in standard laboratory medium  
604 (7H9/7H10). Every library in the 14 replicates has a mean saturation i.e., percentage of TA sites in the  
605 genome with 1 or more transposon insertions, of 0.65, totaling to a saturation of 0.85 for the entire  
606 dataset. As these are 14 independent libraries, the probability of a non-essential site with zero insertions  
607 for stochastic reasons is quite small. However, there is a lack of insertions in non-permissive sites in non-  
608 essential regions, which account for 9% of all TA sites. Most of the remaining sites with zero insertions  
609 correspond to essential regions.

610 This high level of saturation enabled us to reliably observe the nucleotide bias of insertion  
611 counts at different TA Sites. The dataset was normalized using TTR normalization in Transit (dividing by  
612 the total counts in each dataset, with top 1% trimmed to mitigate influence of outliers, and scaling back  
613 up so the mean count at non-zero sites is 100.0). We identified essential regions as consecutive sequences  
614 of 6 or more TA sites with counts of two or less and subsequently removed them. Using the resulting  
615 dataset, we were able to explain nucleotide bias at TA Sites not only for H37Rv but also for other  
616 mycobacteria and non-mycobacterial Himar1 TnSeq datasets.

617

### 618 **Significance of the Correlation of Insertion Counts between TnSeq Datasets**

619 The correlation of insertion counts at TA sites between TnSeq datasets was calculated using a Pearson  
620 correlation coefficient. As mentioned previously, the log of insertion counts was used, since the Pearson  
621 Correlation Coefficient assumes that the input data is normally distributed. The two-tailed T-test for the  
622 means of two independent samples was used to measure whether the expected value differs significantly  
623 between samples. Since we do not assume population variance between the two datasets is equal, the  
624 Welch's t-test is performed.

625

### 626 **10-Fold Cross Validation Linear Regression**

627 The data was split for 10-Fold cross validation using `sklearn.model_selection.KFold`. Within these  
628 folds, we used `sklearn.Ridge` with `alpha=0.1` to train and test linear models (target values of log insertion  
629 counts or LFCs) with L2 regularization.

630

### 631 **Hyper parameter Tuning the Neural Network**

632 The data was separated into training and testing using a 70-30 train-test split. We used 10-Fold  
633 cross validation on the 70% training split of the data to tune the number of nodes per hidden layer,  
634 number of hidden layers, the activation function, value of alpha and whether to use early stopping. We  
635 used scikit-learn's `GridSearchCV` to perform this operation and checked the accuracy of the final hyper  
636 parameters set on the reserved 30% set. Afterwards, we used the tuned parameters to perform a 10-fold  
637 cross validation on the whole dataset to accurately judge the model and account for data biases.

638

### 639 **Mean LFCs per Nucleotide-Position pair**

640 For every position  $\pm 20$  bp from the TA site, we filtered for nucleotides 'A', 'T', 'C', and 'G'. We took  
641 the mean LFC of the training samples (TA sites) with that nucleotide in that position. This calculation

642 yielded the mean LFC for each nucleotide at each position 20 bp from the TA site, which were then  
643 visualized as a heatmap with a diverging color palette.

644

#### 645 **Model Adjustment Calculations**

646 Each TnSeq dataset has a slightly different LFC distribution. Thus, the predictions of a TnSeq  
647 dataset from the STLM, trained on H37Rv data, had to be adjusted. This was accomplished by a simple  
648 regression-based procedure. First, we determined the linear relationship between the mean LFC for each  
649 tetra-nucleotide in H37Rv by regressing it against the mean LFC of each tetra-nucleotide in our target  
650 strain. The linear relationship could be represented as  $targetStrainLFCs = m * H37RvLFCs +$   
651  $offset$ . We used this relationship to adjust the LFC predictions made by the STLM using the target strain's  
652 data  $LFC_{adjusted} = m * LFC_{STLM} + offset$ .

653

#### 654 **Average Change in Observed LFC vs. Average Change in Predicted LFC Between Strains**

655 In comparing the genome sequences of *M. abscessus* ATCC 19977 and the Taiwan49 clinical  
656 isolate, there are 9,303 TA sites with exactly one SNP in the surrounding  $\pm 4$  bp window. There are 8  
657 positions and 12 possible substitutions per position, thus 96 possible SNPs that can occur. For each of  
658 these possible nucleotide changes, we calculated the difference between the observed LFC in the  
659 reference strain and the observed LFC in the isolate strain. The mean of this difference was determined  
660 to be the mean observed LFC difference for that SNP. We performed a similar calculation for the predicted  
661 LFCs. Using the STLM, we found the predicted LFCs at a TA sites in the reference strain and predicted LFCs  
662 at TA sites with a specific SNP in the clinical isolate. The average of the difference in these two predicted  
663 LFCs was the mean change in predicted LFC.

664

#### 665 **Using the Bernoulli Distribution to filter small essential genes before training the Gene+TTN model**

666           The first step in fitness estimation is to identify and remove any essential genes. These genes  
667 are excluded from the Gene+TTN analysis. First, larger essential genes (with > ~10 TA sites) are identified  
668 using the Gumbel method in TRANSIT. Then smaller essential genes with no insertions are identified and  
669 removed based on a Bernoulli calculation. Given the probability that an insertion does not occur ( $p=1.0-$   
670 saturation), the probability of  $k$  TA sites out of  $n$  total having no insertions follows the Binomial  
671 Distribution:

$$672 \quad P(k) = \binom{n}{k} p^k q^{n-k}$$

673 Thus, the probability that all TA sites in a gene have 0 insertions is a Bernoulli distribution where  $k=n$ :

$$674 \quad P(n) = p^n (1 - p)^0 = p^n$$

675 We use this formula to determine the minimum  $n$  such that  $P(n) < 0.05$ , and we then label any genes with  
676  $n$  or more TA sites, all of which have insertion counts of 0, as ‘Essential-B’ (“ESB”). This method is a  
677 necessary additional step to the Gumbel method to find smaller genes that may have been missed,  
678 especially in datasets with lower saturation.

679

## 680 **Availability**

681 The source code (Python scripts) for performing the calculations described in this paper (including the  
682 TTN-Fitness model) are available at [github.com/ioerger/TTN-Fitness](https://github.com/ioerger/TTN-Fitness). The raw data files (wig files with  
683 insertion counts at TA sites) for the 14 replicate libraries of *M. tuberculosis*, along with 3 replicates for *M.*  
684 *abscessus* Taiwan49, can also be found in the `demodata/` directory of the same github repository.

685

## 686 **Funding**

687 This work was supported in part by NIH grant AI143575 (TRI, CMS, EJR).

688

689

690 **References**

- 691 Cain, A. K., L. Barquist, A. L. Goodman, I. T. Paulsen, J. Parkhill and T. van Opijnen (2020). "A decade of  
692 advances in transposon-insertion sequencing." Nat Rev Genet **21**(9): 526-540.
- 693 Chao, M. C., J. R. Pritchard, Y. J. Zhang, E. J. Rubin, J. Livny, B. M. Davis and M. K. Waldor (2013). "High-  
694 resolution definition of the *Vibrio cholerae* essential gene set with hidden Markov model-based analyses  
695 of transposon-insertion sequencing data." Nucleic Acids Res **41**(19): 9033-9048.
- 696 DeJesus, M. A., C. Ambadipudi, R. Baker, C. Sasseti and T. R. Ioerger (2015). "TRANSIT--A Software Tool  
697 for Himar1 TnSeq Analysis." PLoS Comput Biol **11**(10): e1004401.
- 698 DeJesus, M. A., E. R. Gerrick, W. Xu, S. W. Park, J. E. Long, C. C. Boutte, E. J. Rubin, D. Schnappinger, S.  
699 Ehrt, S. M. Fortune, C. M. Sasseti and T. R. Ioerger (2017). "Comprehensive Essentiality Analysis of the  
700 *Mycobacterium tuberculosis* Genome via Saturating Transposon Mutagenesis." mBio **8**(1).
- 701 Dornan, J., H. Grey and J. M. Richardson (2015). "Structural role of the flanking DNA in mariner  
702 transposon excision." Nucleic Acids Res **43**(4): 2424-2432.
- 703 Dragset, M. S., T. R. Ioerger, M. Loevenich, M. Haug, N. Sivakumar, A. Marstad, P. J. Cardona, G.  
704 Klinkenberg, E. J. Rubin, M. Steigedal and T. H. Flo (2019). "Global Assessment of *Mycobacterium avium*  
705 subsp. *hominissuis* Genetic Requirement for Growth and Virulence." mSystems **4**(6).
- 706 Draper, N. R. and H. Smith (1998). Applied regression analysis. New York, Wiley.
- 707 Gawronski, J. D., S. M. Wong, G. Giannoukos, D. V. Ward and B. J. Akerley (2009). "Tracking insertion  
708 mutants within libraries by deep sequencing and a genome-wide screen for *Haemophilus* genes required  
709 in the lung." Proc Natl Acad Sci U S A **106**(38): 16422-16427.

- 710 Gey van Pittius, N. C., S. L. Sampson, H. Lee, Y. Kim, P. D. van Helden and R. M. Warren (2006).  
711 "Evolution and expansion of the Mycobacterium tuberculosis PE and PPE multigene families and their  
712 association with the duplication of the ESAT-6 (esx) gene cluster regions." BMC Evol Biol **6**: 95.
- 713 Goodsell, D. S. and R. E. Dickerson (1994). "Bending and curvature calculations in B-DNA." Nucleic Acids  
714 Res **22**(24): 5497-5503.
- 715 Goryshin, I. Y., J. A. Miller, Y. V. Kil, V. A. Lanzov and W. S. Reznikoff (1998). "Tn5/IS50 target  
716 recognition." Proc Natl Acad Sci U S A **95**(18): 10716-10721.
- 717 Goryshin, I. Y. and W. S. Reznikoff (1998). "Tn5 in vitro transposition." J Biol Chem **273**(13): 7367-7374.
- 718 Green, B., C. Bouchier, C. Fairhead, N. L. Craig and B. P. Cormack (2012). "Insertion site preference of  
719 Mu, Tn5, and Tn7 transposons." Mob DNA **3**(1): 3.
- 720 Korswagen, H. C., R. M. Durbin, M. T. Smits and R. H. Plasterk (1996). "Transposon Tc1-derived,  
721 sequence-tagged sites in Caenorhabditis elegans as markers for gene mapping." Proc Natl Acad Sci U S A  
722 **93**(25): 14680-14685.
- 723 Lampe, D. J., B. J. Akerley, E. J. Rubin, J. J. Mekalanos and H. M. Robertson (1999). "Hyperactive  
724 transposase mutants of the Himar1 mariner transposon." Proc Natl Acad Sci U S A **96**(20): 11428-11433.
- 725 Lampe, D. J., T. E. Grant and H. M. Robertson (1998). "Factors affecting transposition of the Himar1  
726 mariner transposon in vitro." Genetics **149**(1): 179-187.
- 727 Long, J. E., M. DeJesus, D. Ward, R. E. Baker, T. Ioerger and C. M. Sassetti (2015). "Identifying essential  
728 genes in Mycobacterium tuberculosis by global phenotypic profiling." Methods Mol Biol **1279**: 79-95.

- 729 Murray, S. M., G. Panis, C. Fumeaux, P. H. Viollier and M. Howard (2013). "Computational and genetic  
730 reduction of a cell cycle to its simplest, primordial components." PLoS Biol **11**(12): e1001749.
- 731 Perry, B. J., M. S. Akter and C. K. Yost (2016). "The Use of Transposon Insertion Sequencing to  
732 Interrogate the Core Functional Genome of the Legume Symbiont *Rhizobium leguminosarum*." Front  
733 Microbiol **7**: 1873.
- 734 Reiner, A., D. Yekutieli and Y. Benjamini (2003). "Identifying differentially expressed genes using false  
735 discovery rate controlling procedures." Bioinformatics **19**(3): 368-375.
- 736 Rumelhart, D. E., G. E. Hinton and R. J. Williams (1986). "Learning Representations by Back-Propagating  
737 Errors." Nature **323**(6088): 533-536.
- 738 Sassetti, C. M., D. H. Boyd and E. J. Rubin (2003). "Genes required for mycobacterial growth defined by  
739 high density mutagenesis." Mol Microbiol **48**(1): 77-84.
- 740 Solaimanpour, S., F. Sarmiento and J. Mrazek (2015). "Tn-seq explorer: a tool for analysis of high-  
741 throughput sequencing data of transposon mutant libraries." PLoS One **10**(5): e0126070.
- 742 van Opijnen, T., K. L. Bodi and A. Camilli (2009). "Tn-seq: high-throughput parallel sequencing for fitness  
743 and genetic interaction studies in microorganisms." Nat Methods **6**(10): 767-772.
- 744 Zaveri, A., R. Wang, L. Botella, R. Sharma, L. Zhu, J. B. Wallach, N. Song, R. S. Jansen, K. Y. Rhee, S. Ehrh  
745 and D. Schnappinger (2020). "Depletion of the DarG antitoxin in *Mycobacterium tuberculosis* triggers  
746 the DNA-damage response and leads to cell death." Mol Microbiol.
- 747 Zomer, A., P. Burghout, H. J. Bootsma, P. W. Hermans and S. A. van Hijum (2012). "ESSENTIALS: software  
748 for rapid analysis of high throughput transposon insertion sequencing data." PLoS One **7**(8): e43012.



749 **FIGURES and TABLES**

750 **Figure 1: Insertion Counts across 14 H37Rv libraries in a region spanning 75 consecutive TA sites.**  
751 In **Panel A**, a point is plotted for insertion counts at each coordinate for each replicate. This scatter plot  
752 is then overlaid with a box-and-whisker plot reflecting the mean and range of insertion counts at each  
753 site. The region includes *trpG* for comparison, which is an essential gene, and hence insertion counts  
754 are 0 in this gene. In the non-essential genes, the insertion counts vary more between TA sites than  
755 within, supporting that some TA sites have a higher propensity for insertions than others. **Panel B** shows  
756 the same 75 sites after randomizing the insertion counts at all TA sites except those marked ES and  
757 those showing the non-permissive pattern. The mean and range of counts at each non-essential TA site  
758 are much more uniform when randomized.

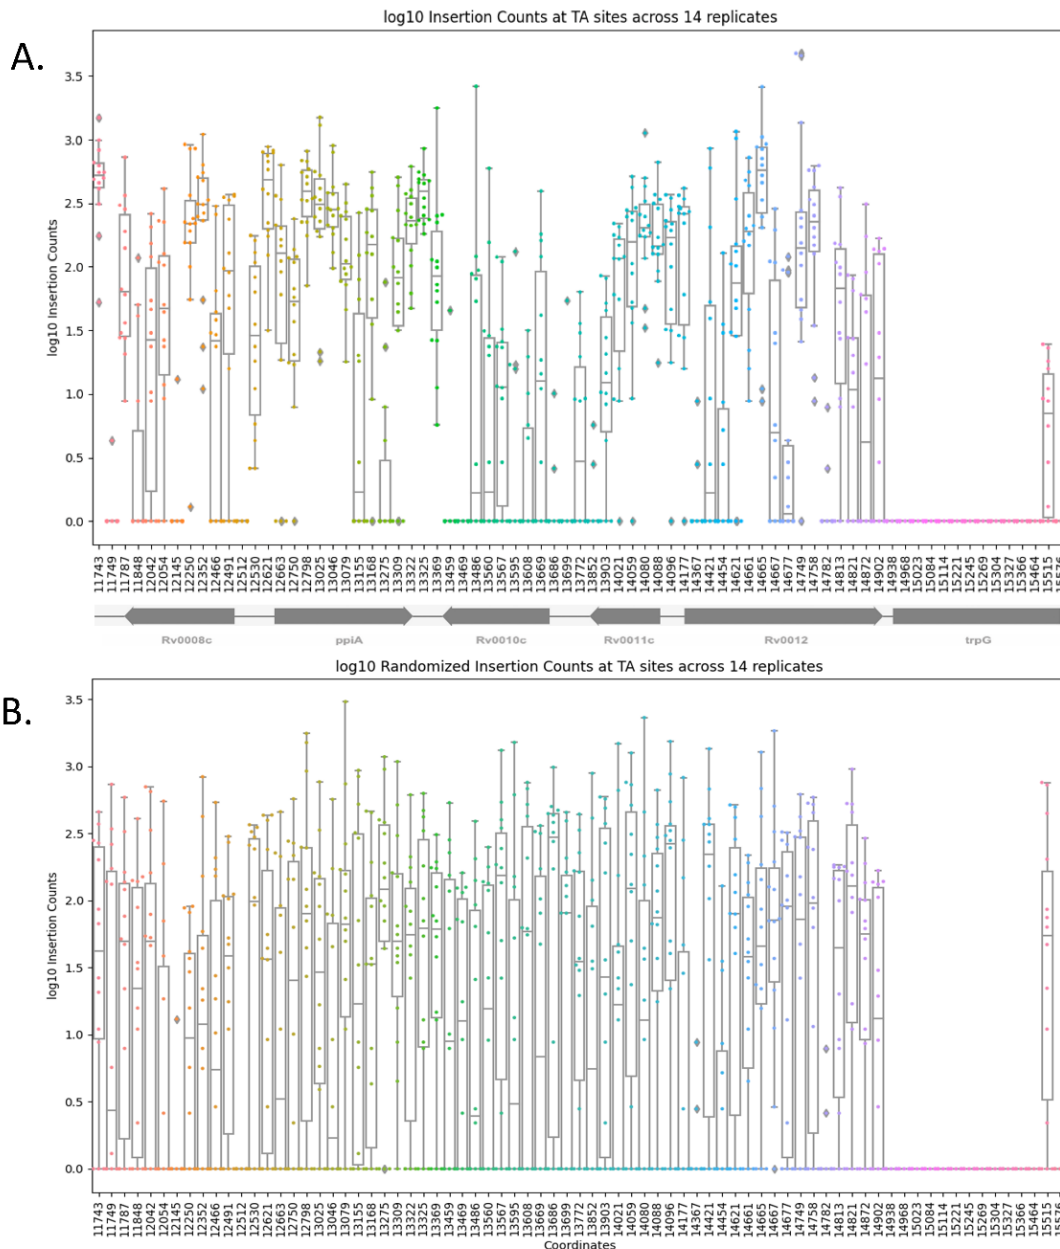

759  
760

761 **Figure 2: Nucleotide Probabilities at positions -20...+20 from the TA site, for three ranges of Insertion**  
762 **Counts.** The 3 ranges of the log insertion counts depicted in Panels B,C,D were found by dividing the  
763 difference in the maximum log count (10.83) and minimum log count (-2.30) by 3. The boundaries of the  
764 splits were at 6.45 and 2.07. **Panel A** shows the pattern across all ~65000 TA sites in non-essential  
765 regions. **Panel B** shows the pattern across 8992 sites in the lower third of the range, **Panel C** shows the  
766 pattern across 51164 sites in the middle third of the range and **Panel D** shows the pattern across 1172  
767 sites in the higher third of the range.

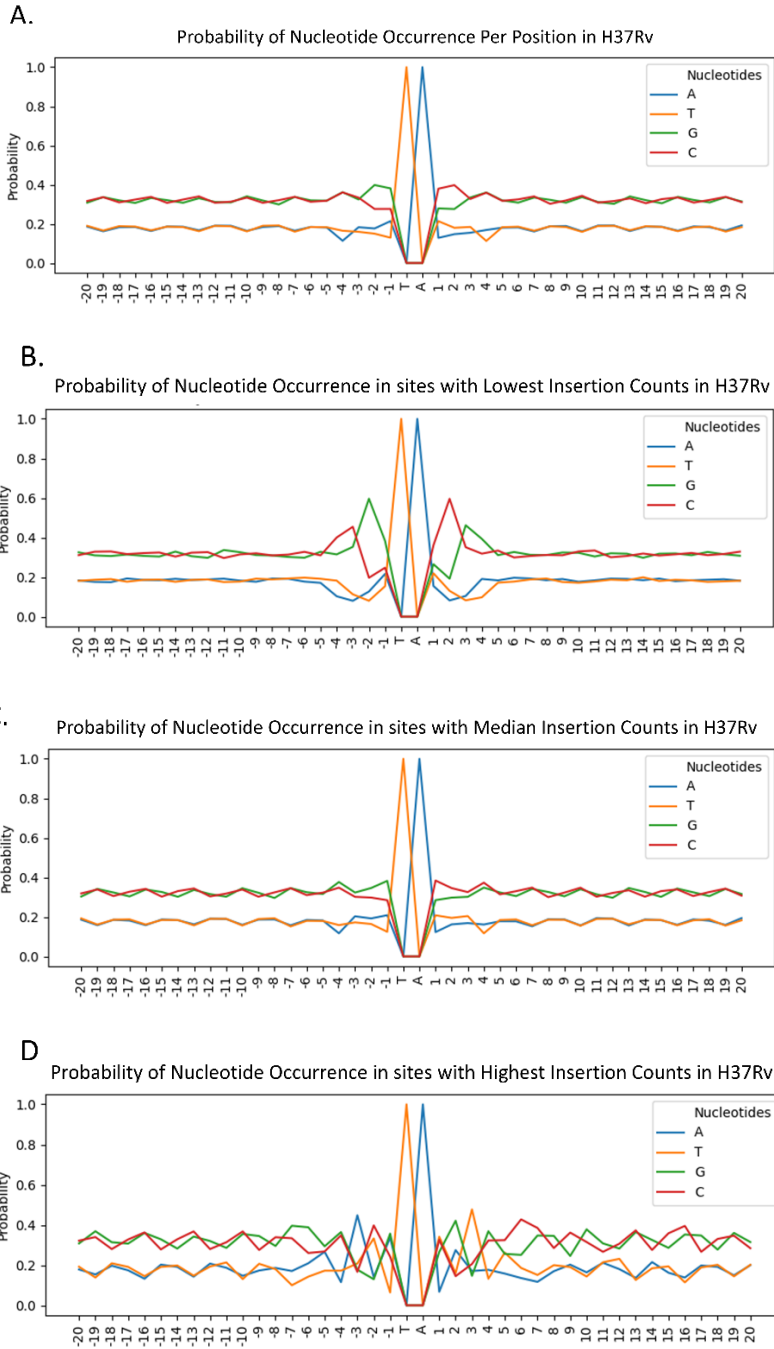

772 **Figure 3: Coefficients and Accuracy Assessment of Linear Regression Model trained on nucleotides as**  
773 **covariates**

774 **Panel A** shows Predicted Counts vs. Actual log Insertion Counts using Linear Regression. The average  
775 predictive power of the Linear Regression Model trained with one-hot-encoded nucleotides as the input  
776 and log insertion counts as the output using 10-fold cross validation. The predictive power is moderate  
777 ( $R^2=0.318$ ), meaning it is able to explain 31% of the variation in insertion counts based on surrounding  
778 nucleotides. **Panel B** shows Coefficients from the trained Linear Model. The coordinates along the x-axis  
779 give the positions relative to, but not including, the TA site. The model is trained on one-hot-encoded  
780 nucleotides and a target value of log Insertion Counts. The symmetry of the pattern is visible in positions  
781 -4, -3, -2, -1 and +1, +2, +3, +4. The non-permissive pattern (CG)GnTAnC(CG) is visible in this window, as  
782 well as high coefficients associated with "A" and "T".

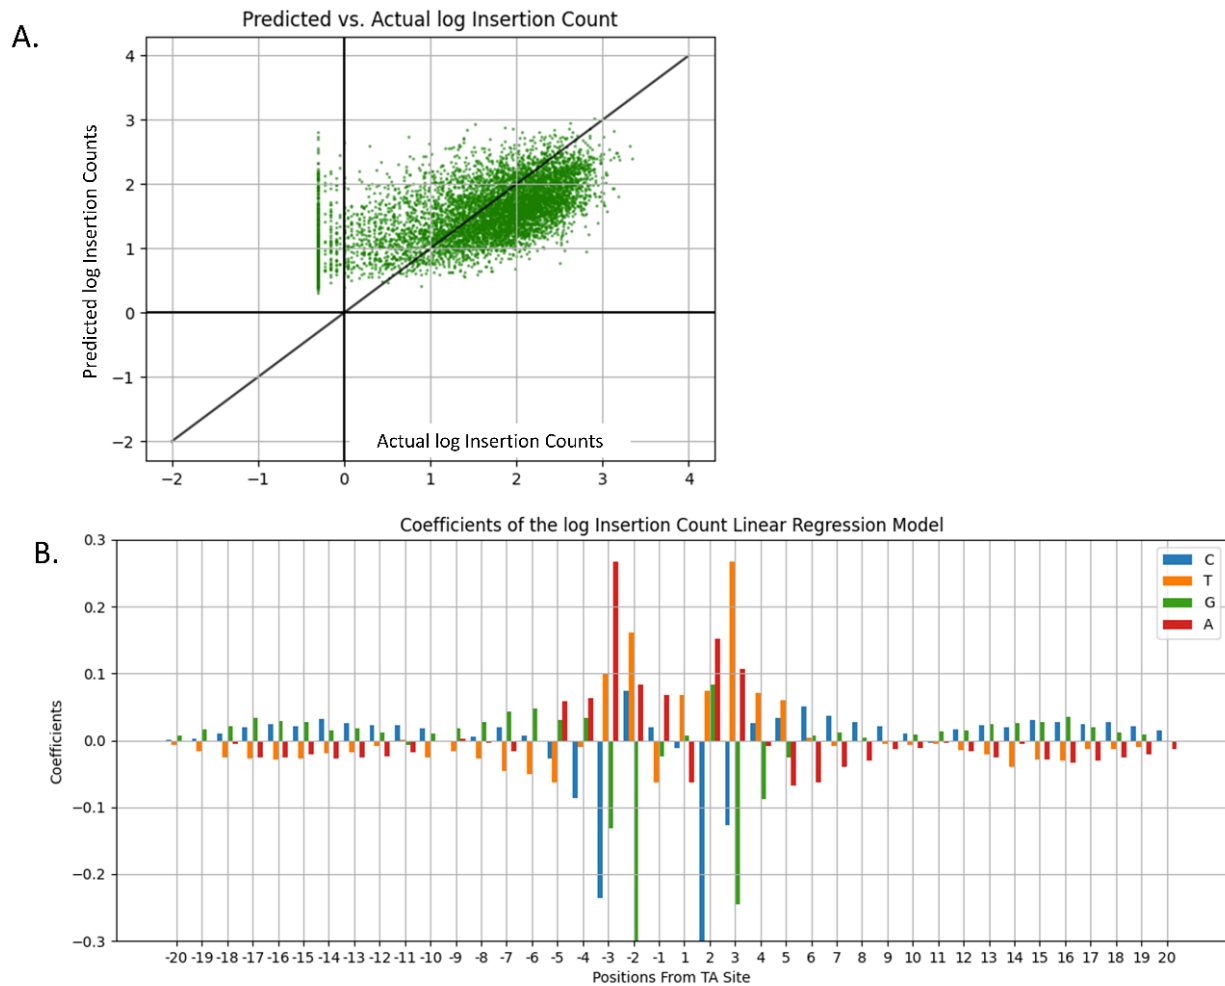

783  
784  
785

786 **Figure 4: Enrichment and Depletion of Nucleotides surrounding TA sites for the 14 libraries of H37Rv**  
787 **in-vitro.**

788 The mean of each filtered nucleotide at every position in a 20-bp window of the TA site in H37Rv dataset  
789 is visualized here. The heatmap centered at the median of mean LFCs calculated with a median +1.5 max  
790 and median-1.5 minimum. Nucleotides colored green at certain positions are enriched, while those  
791 colored purple are depleted (relative to the global average nucleotide content).  
792

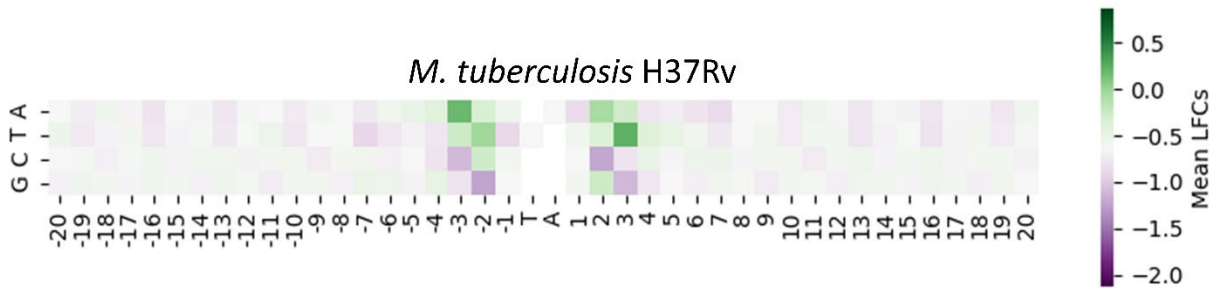

793  
794  
795

796 **Figure 5: Predicted LFC vs. Actual LFC using STLM.**

797 **Panel A** shows a plot of the actual LFCs vs. the LFCs predicted by our model. The predictive power of this  
 798 model is about the same as the Neural Network ( $R^2=0.468$ ) but **Panel B** shows there is a high correlation  
 799 of mean LFCs of each tetra-nucleotide and the coefficient in the STLM of the same tetra-nucleotide,  
 800 indicating our model represents our data well. **Panel C** shows the coefficients associated with each  
 801 tetra-nucleotide (Supplemental Table T4), sorted by coefficient value.  
 802

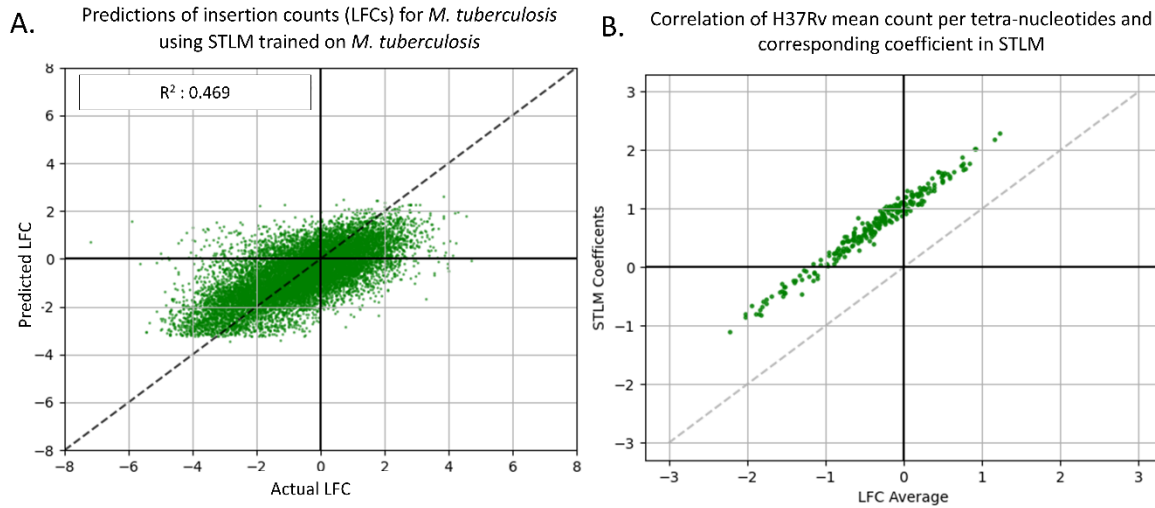

803

C.

| Tetra nucleotide | Correlation Coef | Num. Instances |
|------------------|------------------|----------------|
| CACA             | 1.540            | 559            |
| CATG             | 1.526            | 479            |
| GACA             | 1.310            | 583            |
| TACA             | 1.266            | 135            |
| GATA             | 1.201            | 244            |
| CATA             | 1.183            | 157            |
| CACT             | 1.085            | 217            |
| TACG             | 1.084            | 266            |
| GATG             | 1.077            | 857            |
| TATG             | 1.039            | 132            |
| ...              | ...              | ...            |
| CCGT             | -1.329           | 781            |
| TCGG             | -1.333           | 1519           |
| CGGA             | -1.351           | 1341           |
| CCGC             | -1.411           | 1816           |
| CCGA             | -1.472           | 1830           |
| CGGC             | -1.475           | 2441           |
| CGGG             | -1.480           | 2082           |
| CGGT             | -1.487           | 1008           |
| CCGG             | -1.533           | 2605           |
| ATTT             | -1.848           | 54             |

804

805

806

807 **Figure 6: Illustration of the STLM.**

808 For each TA site the upstream tetra-nucleotide and reverse complemented (rc) downstream tetra-  
 809 nucleotide are extracted. The relative bits are set in a 256-bit vector that is given as an input to the  
 810 STLM to predict LFCs.

811

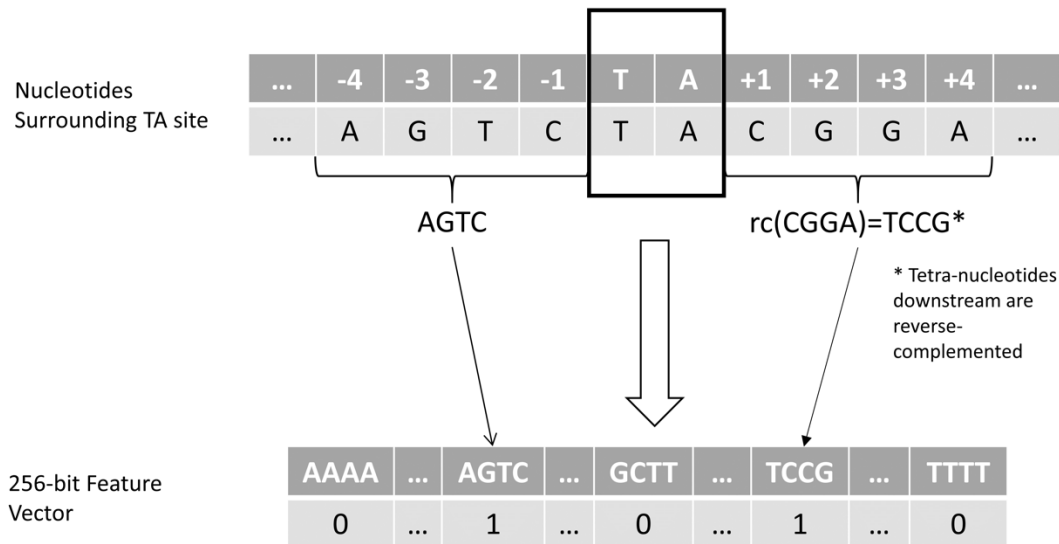

812  
813

814 **Figure 7: Enrichment and Depletion surrounding TA sites for Mycobacterial Tn-Seq Datasets.**  
815 The four heatmaps are calculated in the same manner that the H37Rv heatmap was calculated in Figure  
816 4. The mean of each filtered nucleotide at every position in a  $\pm 20$  bp window around the TA sites is  
817 calculated. The patterns of all the heatmaps look very similar to both each other and to the H37Rv  
818 heatmap in Figure 4.  
819

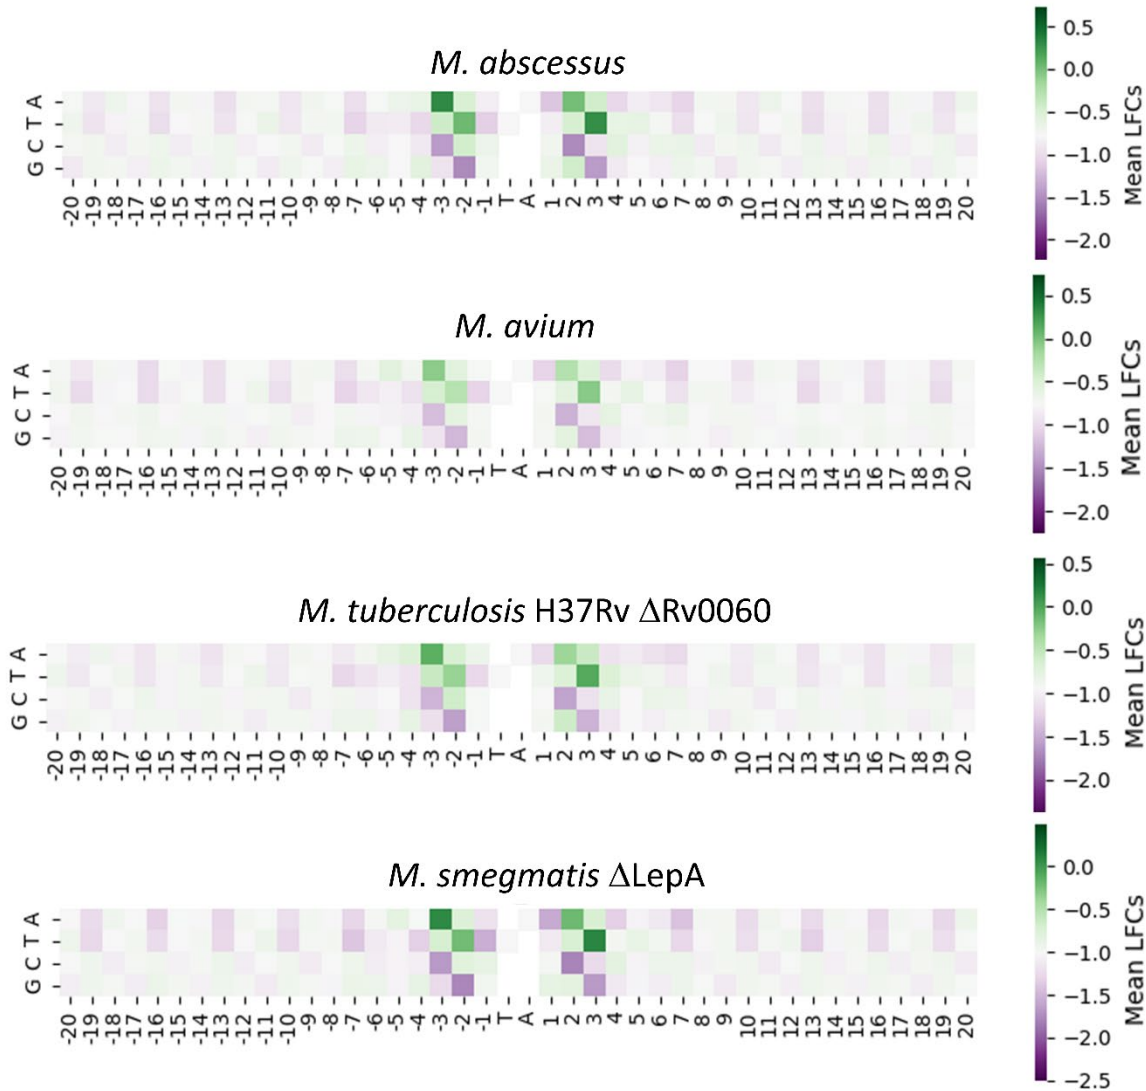

820  
821  
822  
823

824 **Figure 8: Enrichment and Depletion surrounding TA sites for non-Mycobacterial Tn-Seq Datasets.**  
825 The four heatmaps are calculated in the same manner that the H37Rv heatmap (Fig. 4) and  
826 mycobacterial heatmaps (Fig. 7) were calculated. The mean of each filtered nucleotide at every position  
827 in a  $\pm 20$  bp window around each TA site is calculated, and centered on the median of mean LFCs.  
828

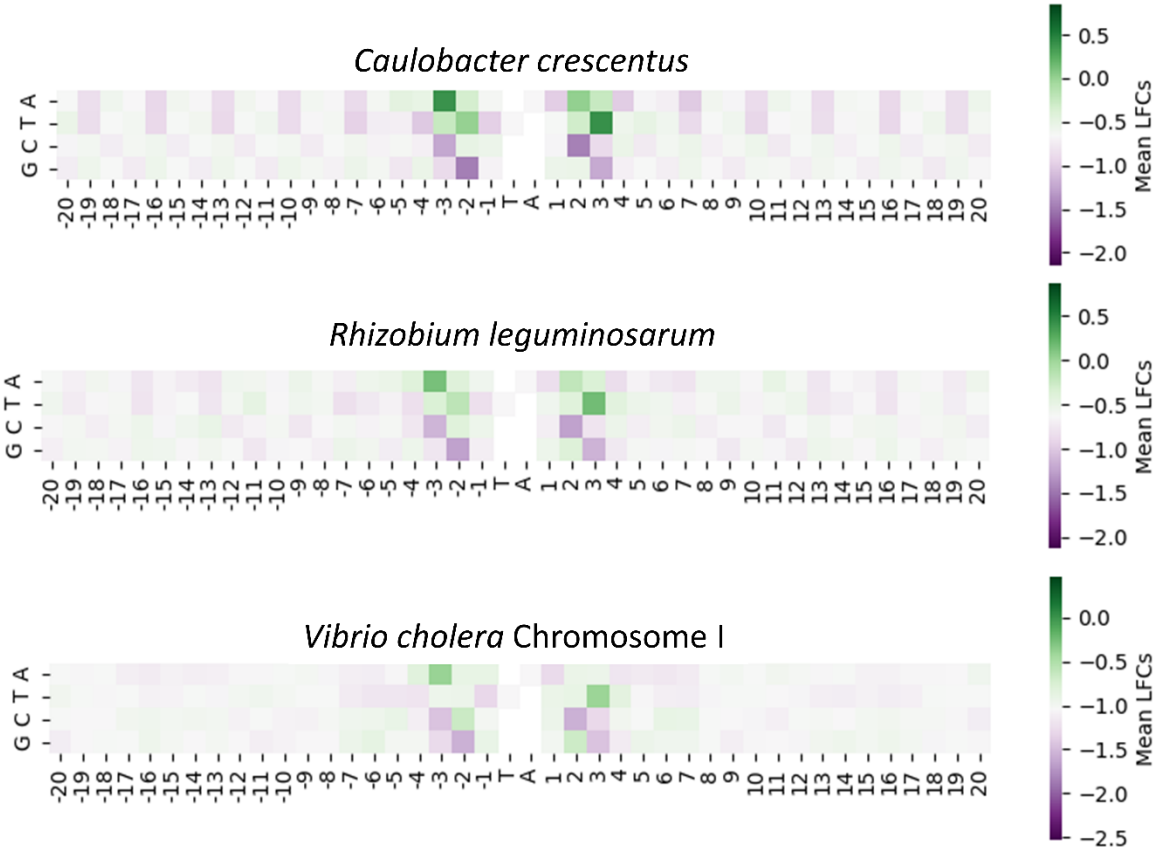

829  
830  
831



832 **Figure 9: *M. abscessus* Taiwan49 Clinical Isolate Dataset.**

833 The heatmap in **Panel A** is calculated in the same manner that the previous heatmaps were calculated.  
834 The pattern of this heatmap looks very similar to the H37Rv heatmap (Fig. 4) as well as the heatmap for  
835 the *M. abscessus* ATCC 19977 reference strain (Fig. 8). The predictive power of the STLM on the Mab  
836 T49 dataset in **Panel B** shows a high  $R^2$  value of 0.517, like that of the *M. abscessus* reference dataset.  
837 This indicates that nucleotide biases explain at least half of the variance in insertion counts for this  
838 dataset with nucleotide biases.  
839

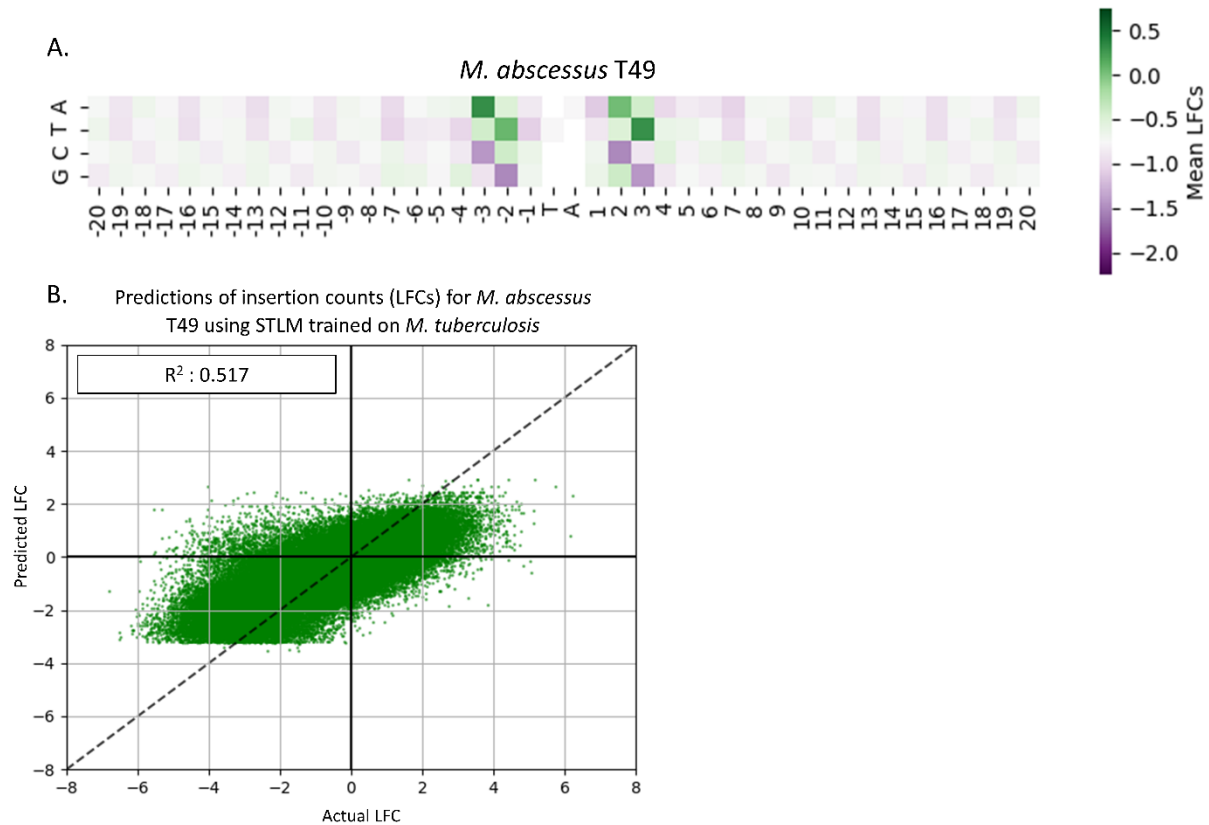

840  
841  
842

843 **Figure 10: SNPs in *M. abscessus* Taiwan49 Clinical Isolate Exhibit Predictable Changes in Nucleotide**  
 844 **Biases.**

845 **Panel A** shows the correlation of changes in observed vs predicted LFCs for the 96 possible SNPs in the -  
 846 4...+4 window from the TA site. The colored markers are the nucleotide-position pairs previously found  
 847 to have the highest biases. The table in **Panel B** is sorted by increasing mean delta observed LFC,  
 848 provides more details on these SNPs. As expected, the most extreme changes occur when the SNP  
 849 occurs in the -3, -2, +2, or +3 positions. The top 10 and bottom 10 values i.e., the biggest decreases and  
 850 biggest increases in LFC follow the heatmap patterns of the Himar1 datasets tested.  
 851

A. Mean Delta Observed vs. Mean Predicted LFC per SNP

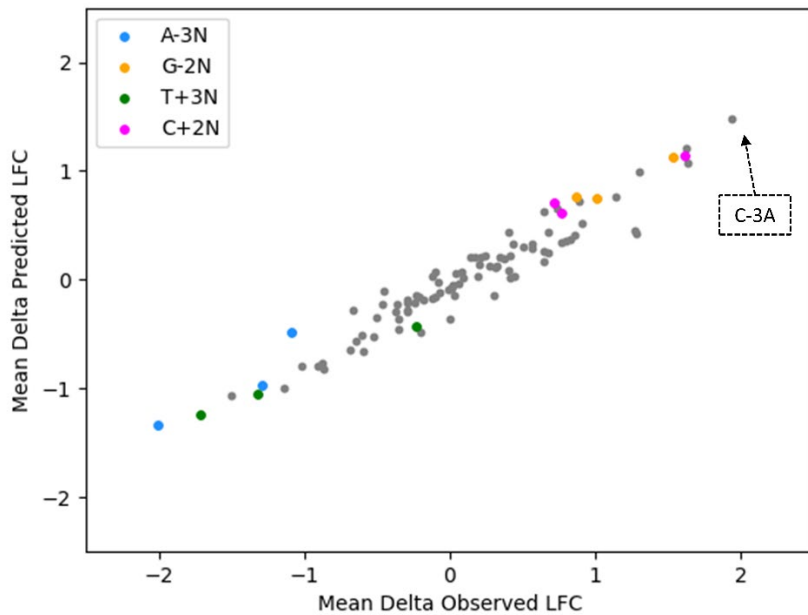

852

B.

| Ref Nucl | Iso Nucl | Position | Num Instances | Mean Delta Obs | Mean Delta Pred |
|----------|----------|----------|---------------|----------------|-----------------|
| A        | C        | -3       | 32            | -2.007         | -1.338          |
| T        | G        | 3        | 36            | -1.714         | -1.242          |
| T        | G        | -2       | 27            | -1.506         | -1.061          |
| T        | C        | 3        | 154           | -1.322         | -1.044          |
| A        | G        | -3       | 147           | -1.290         | -0.970          |
| A        | C        | 2        | 20            | -1.142         | -0.992          |
| A        | T        | -3       | 13            | -1.087         | -0.477          |
| A        | G        | -2       | 191           | -1.0156        | -0.788          |
| T        | C        | -3       | 174           | -0.903         | -0.798          |
| T        | C        | 2        | 210           | -0.879         | -0.769          |
| ...      | ...      | ...      | ...           | ...            | ...             |
| G        | C        | -2       | 54            | 1.0115         | 0.743           |
| C        | T        | -3       | 139           | 1.139          | 0.764           |
| A        | T        | 3        | 11            | 1.269          | 0.458           |
| T        | A        | 2        | 11            | 1.283          | 0.420           |
| G        | A        | -3       | 136           | 1.298          | 0.996           |
| G        | T        | -2       | 25            | 1.537          | 1.122           |
| C        | A        | 2        | 28            | 1.609          | 1.141           |
| G        | T        | 3        | 36            | 1.623          | 1.207           |
| C        | T        | 3        | 146           | 1.636          | 1.081           |
| C        | A        | -3       | 34            | 1.932          | 1.482           |

853

854 **Figure 11: Distribution of HMM+NP and TTN-Fitness states for genes provided in the *Mtb* H37Rv**  
 855 **dataset.**

856 **Panel A** shows the distribution of classification of genes by the two methods. **Panel B** shows the  
 857 confusion matrix of the classification of genes in the two methodologies. Most of genes are labeled NE  
 858 in both models. Genes determined to be “Uncertain” in the HMM+NP model are assigned other states in  
 859 the TTN-Fitness method. A fraction of genes labeled “NE” in the HMM+NP model (highlighted matrix  
 860 components) are reassigned to be “GA” or “GD” using the TTN-Fitness method, indicating that the TTN-  
 861 Fitness method is more sensitive in estimating fitness than the HMM+NP model.  
 862

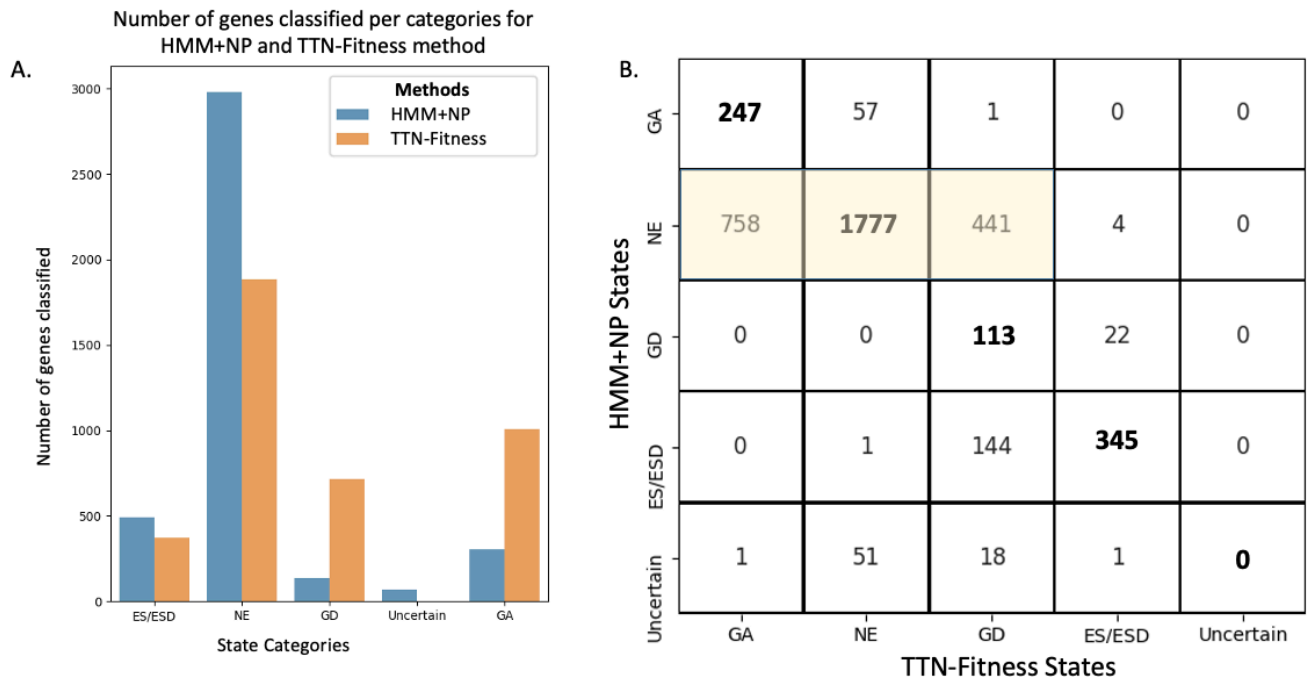

863

864

865

866 **Figure 12: Correlation of coefficients in Gene+TTN model (of the TTN-Fitness method) and coefficients**  
 867 **in models using its components.** Correlation of gene coefficients between the Gene-Only model and the  
 868 TTN Fitness model (**Panel A**) show a linear trend, indicating that most genes behave in the same way  
 869 and yield similar results in both models. However, there are a few that are show log fold change greater  
 870 than this majority. The scale of coefficients in the Gene+TTN model is greater than the Gene-Only  
 871 model, indicating a notable number of gene’s predicted fitness estimate changes with the inclusion of  
 872 nucleotide context. The points with black outlines and labels are genes that we have explored.  
 873 Correlation of coefficients of TTNs in the STLM and the TTN Fitness Model (**Panel B**) has a strong linear  
 874 relationship as well as similar distributions, indicating that the models incorporate in the effects of TTNs  
 875 on the insertion count in the same way.

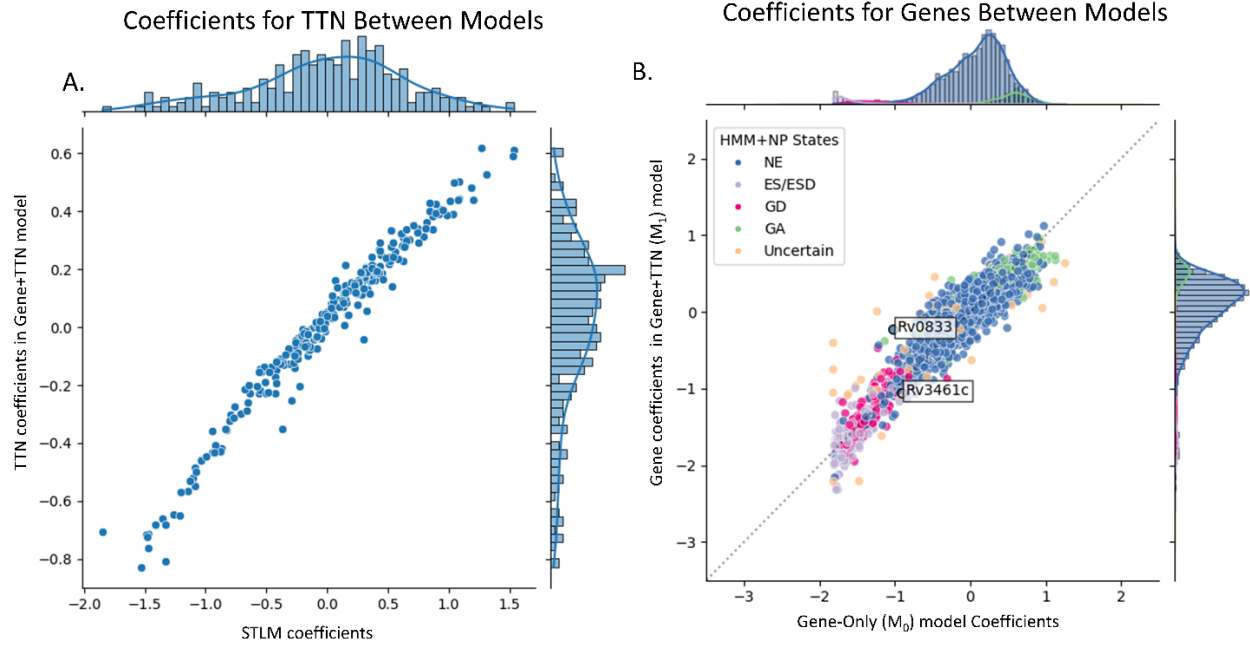

876  
877

878

879 **Figure 13: Plots of gene coefficients versus adjusted p-values in Gene+TTN model, colored by states**  
880 **determined by the HMM+NP model.**

881 The HMM+NP methodology labels genes as “Non-Essential” (NE), “Essential” (ES/ESD), “Growth Defect”  
882 (GD), “Growth Advantage” (GA) and “Uncertain”. “Uncertain” genes are typically smaller genes. The  
883 horizontal dashed line is where adjusted p-value = 0.05 in the Gene+TTN model. By the TTN-Fitness  
884 method, genes below that line are insignificant (gray) and thus “NE”. The vertical solid line is where gene  
885 coefficient C=0 in the Gene+TTN model. By the TTN-Fitness method, colored points left of the line are  
886 “GD” genes and colored points to the right are “GA” genes. The genes with labels are discussed in the  
887 text.  
888

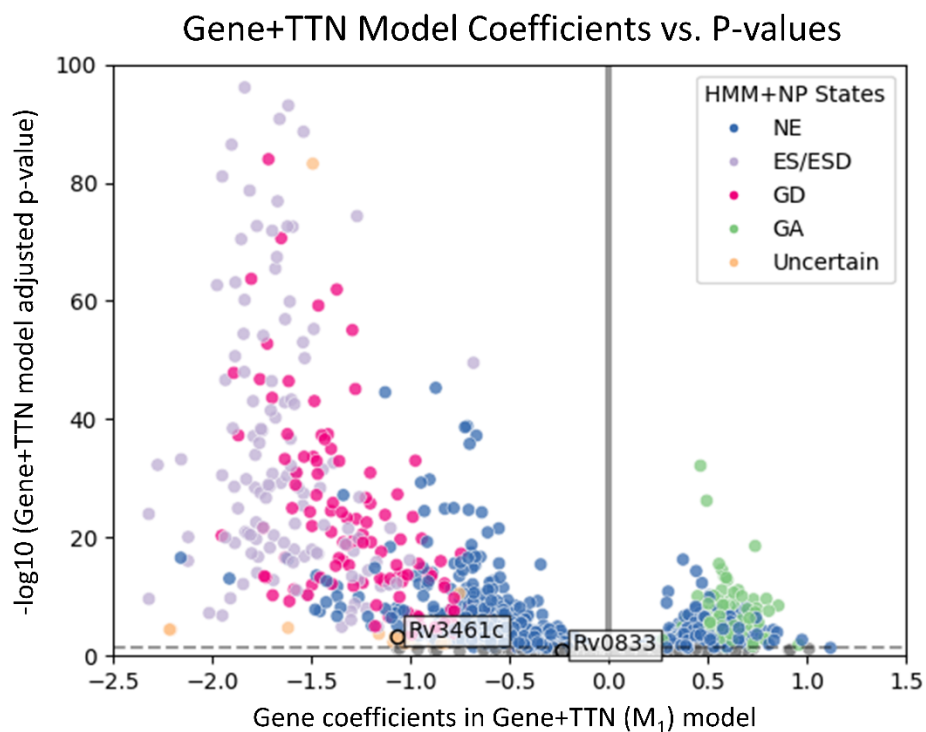

889

890

891

892 **Figure 14: Crystal structure of complex between the Mos1 transposon and DNA.**  
893 DNA double helix, with denatured (single strand) end in the pre-cleavage state. This is a stylized  
894 (cartoon) representation of the interaction. The red nucleotides represent C53-T54-G55-A56 (sites -4...-  
895 1). The yellow nucleotides represent the TA site, T57-A58. The blue nucleotide is G59, which is site +1.  
896 The transposase itself is shown as a molecular surface. Amino acids 119-124 (WVPHLE) are colored  
897 orange and Asp284-His293 are colored green. The two images are vertical 180-degree rotations  
898 illustrating front and back views of the transposon-DNA interaction.  
899

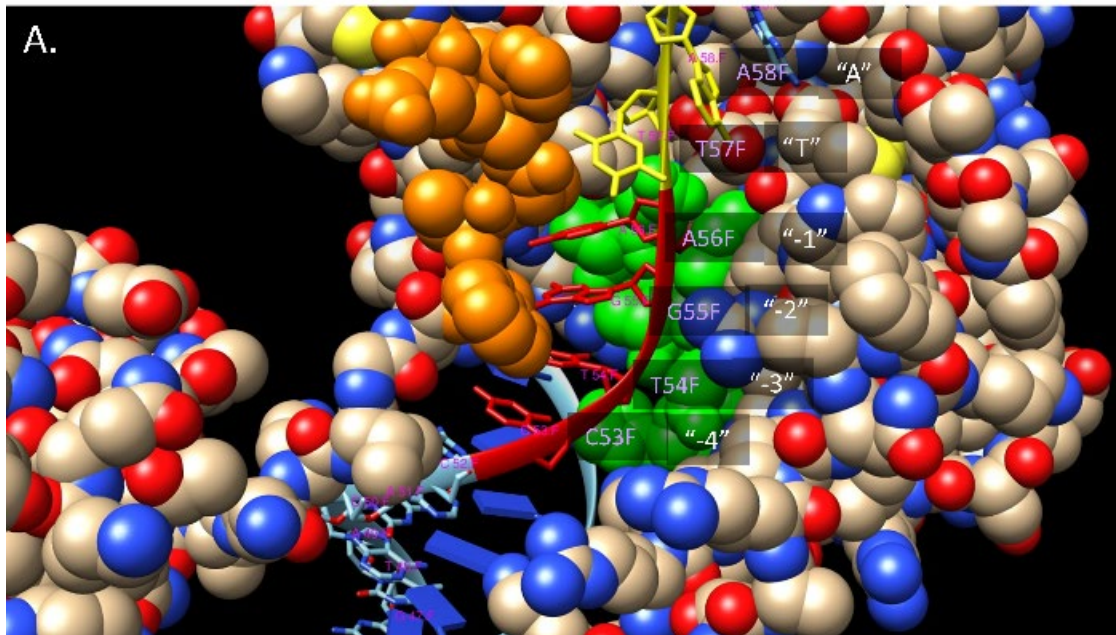

900

180°

901

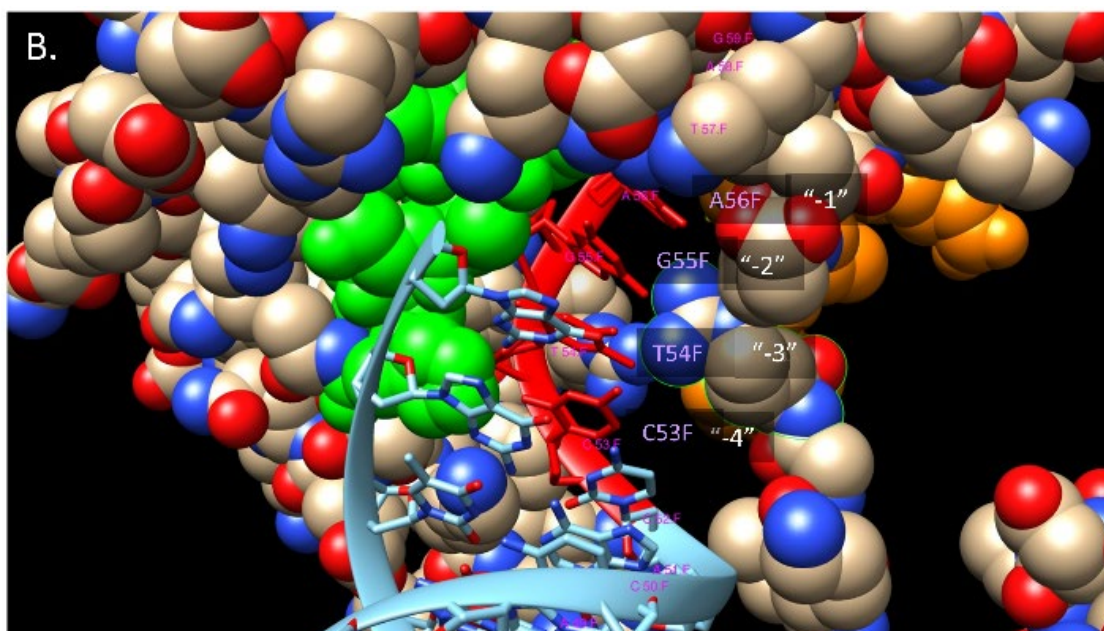

902

903 **Supplemental Figure S1: Heatmap of Correlation of Wig Files**

904 The correlation of log insertion counts in the 14-replicates wig files using the Pearson correlation  
905 coefficient as recorded in Supplemental Table T1.

906

**Pearson Correlation of log Insertion Counts across Datasets**

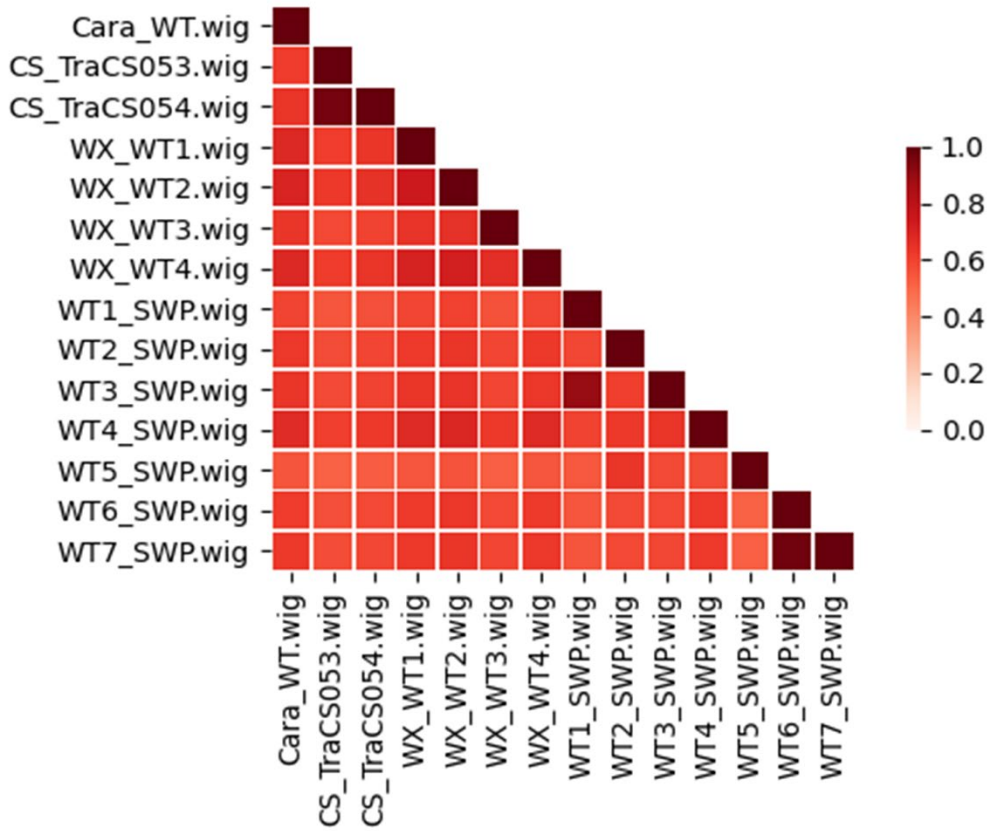

907

908

909 **Supplemental Figure S2: Coefficients from Linear Model Trained using nucleotides in all 40 positions**  
910 **to predict LFCs.**

911 **Panel A** shows Predicted Counts vs. Actual LFC using Linear Regression. The average predictive power of  
912 the linear regression model trained with one-hot-encoded nucleotides in 20 bp from the TA site as the  
913 input and LFCs as the output using 10-fold cross validation. The predictive power was not much higher  
914 than the previous Insertion Counts model, but the variance has decreased, indicating a better model.

915 **Panel B** shows coefficients from the trained model. The coordinates along the x-axis give the positions  
916 relative to, but not including, the TA site. A symmetric pattern is visible in positions -4,-3,-2,-1 and +1,  
917 +2, +3, +4. The non-permissiveness pattern (CG)GnTAnC(CG) is visible in this window as well as high  
918 coefficients associated with "A" and "T".  
919

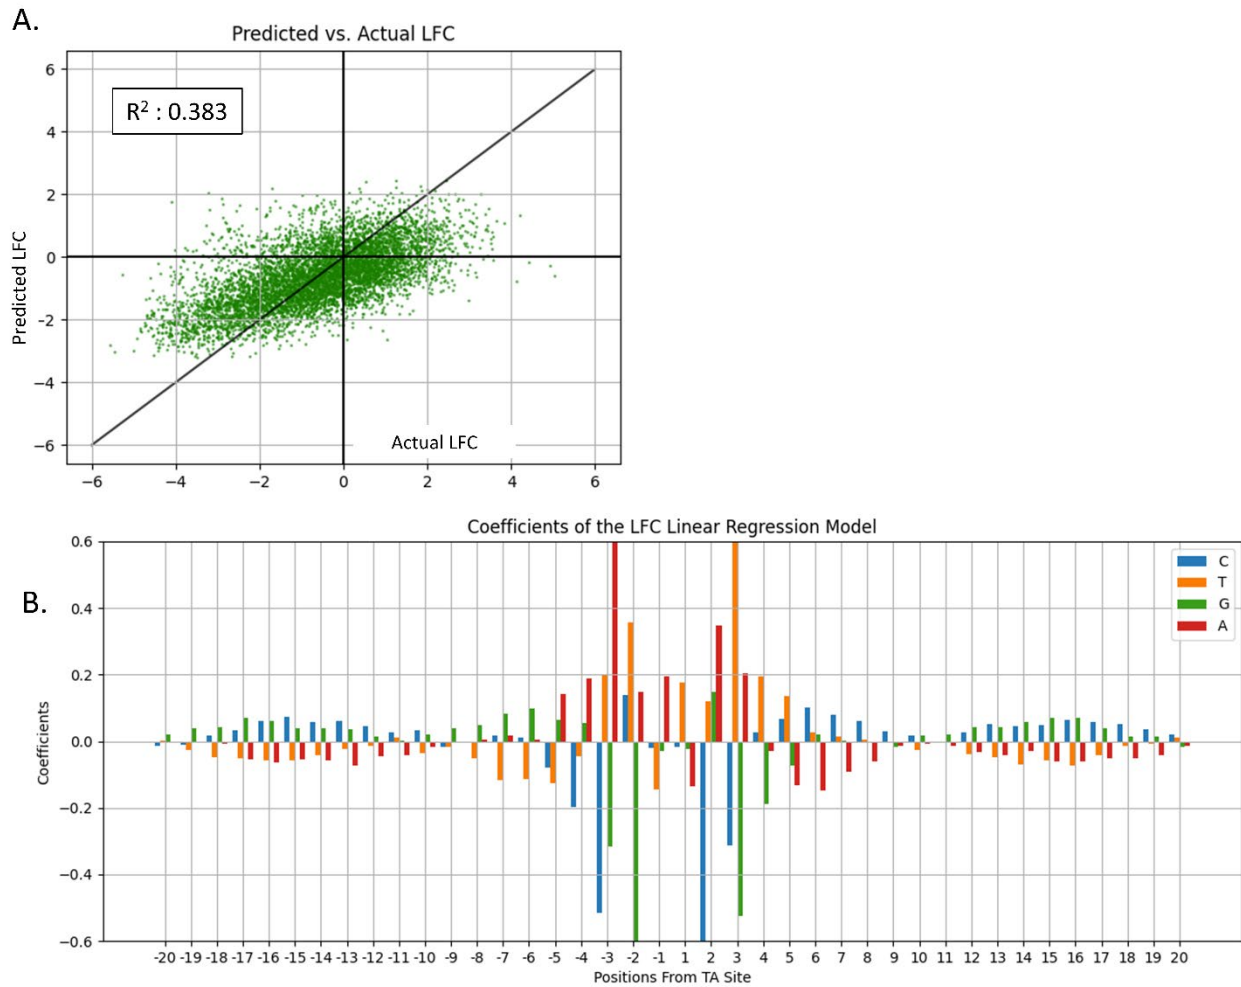

920  
921  
922



923 **Supplemental Figure S3: Predicted LFC vs. Actual LFC using Feed Forward Neural Network.**

924 The input to this linear model was all the one-hot-encoded nucleotides, and the target value as the LFCs.  
925 Using 10-fold cross validation on 70% of the dataset, we found the ideal parameters: 'activation': 'tanh',  
926 'alpha': 0.05, 'early\_stopping': True, 'hidden\_layer\_sizes': (100,),'learning\_rate': 'constant', 'max\_iter':  
927 500, and 'solver': 'adam'. We tested these hyper-parameters on the remaining 30% of the test data and  
928 got a fairly high performing model. We applied these hyper parameters and assessed the model's fit to  
929 the data by performing a 10-fold cross validation of the entire dataset. This yielded an average  
930 predictive power (i.e.  $R^2$ ) that was higher than the previous Insertion Counts Model and LFC Model and  
931 the variance has decreased, indicating a better model.

932

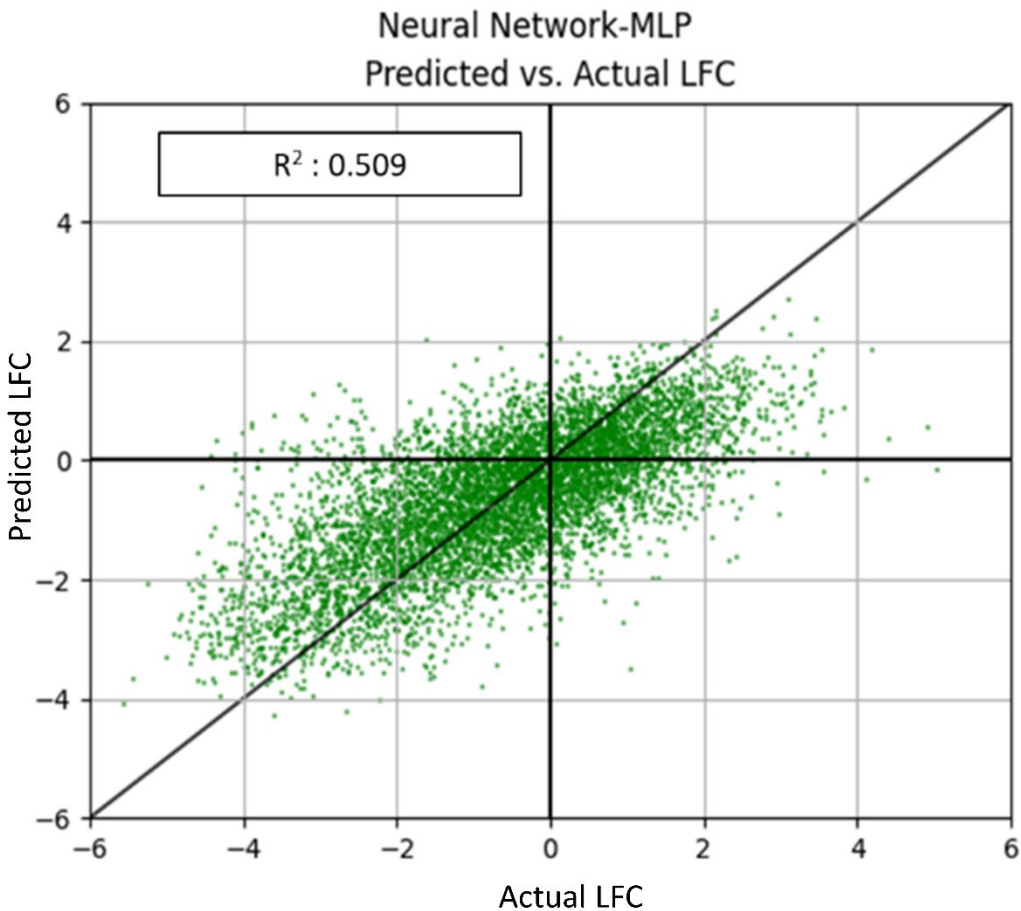

933

934

935

936 **Supplemental Figure S4: LFC Prediction using linear regression with only nucleotides in -4...+4**  
937 **positions from the TA site.**

938 **Panel A** shows Predicted Counts vs. Actual LFC using Linear Regression. The average predictive power of  
939 the Linear Regression Model trained with one-hot-encoded nucleotides in 4 bp from the TA site as the  
940 input and LFCs as the output using 10-fold cross validation. The predictive power is moderate  
941 ( $R^2=0.352$ ), meaning it can explain 35% of the variation in insertion counts based on surrounding  
942 nucleotides, not much different than the LFC linear model trained using all 40 nucleotides, indicating the  
943 nucleotides in this window are very important. **Panel B** shows Coefficients from the trained model. The  
944 coordinates along the x-axis give the positions relative to, but not including the TA site. These  
945 coefficients are almost identical to the relative magnitudes of the nucleotides in the -4...+4 window of  
946 LFC linear model and the log insertion count linear model.  
947

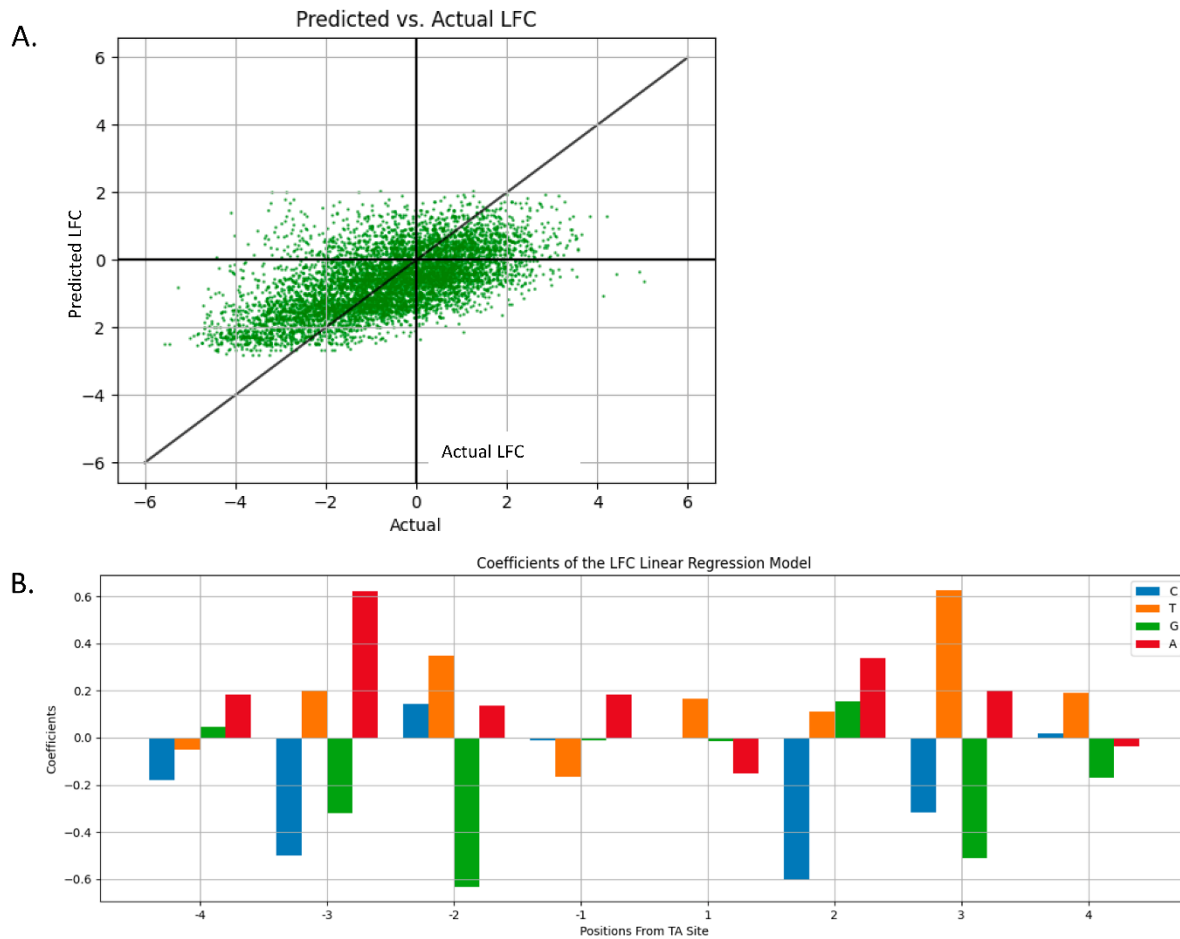

948  
949  
950

951 **Supplemental Figure S5: Coefficients from the STLM.**

952 Coefficients of a linear model trained on one-hot-encoded TTN and a target value of LFCs. The highest  
953 values are for tetra-nucleotides XAXX and the lowest are XCXX and XGXX, where X is any nucleotide A, C,  
954 T or G. P-values obtained from the Wald test, with FDR adjustment showed that coefficients  $\leq -0.234$   
955 and  $\geq 0.315$  are significant.  
956

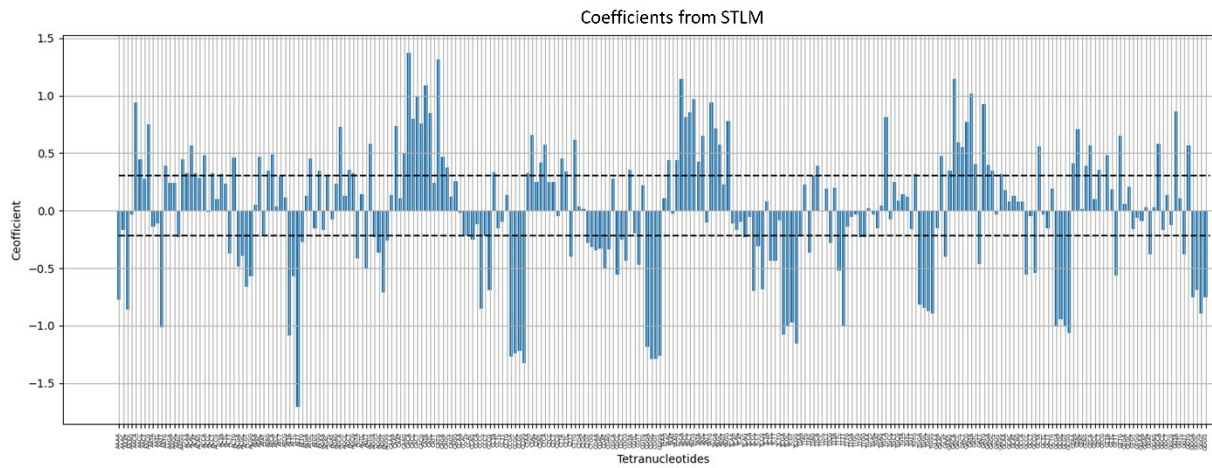

957  
958  
959

960 **Supplemental Figure S6: Predictive Power of STLM on Mycobacterial Datasets.**

961 The predictive power of the STLM on the Mycobacterial datasets have been varied. However, a  $R^2$  value  
962 greater than 0.25 for nearly all the datasets indicates that the nucleotide biases explain *at least* a fourth  
963 of the variance in insertion counts with nucleotide biases.

964

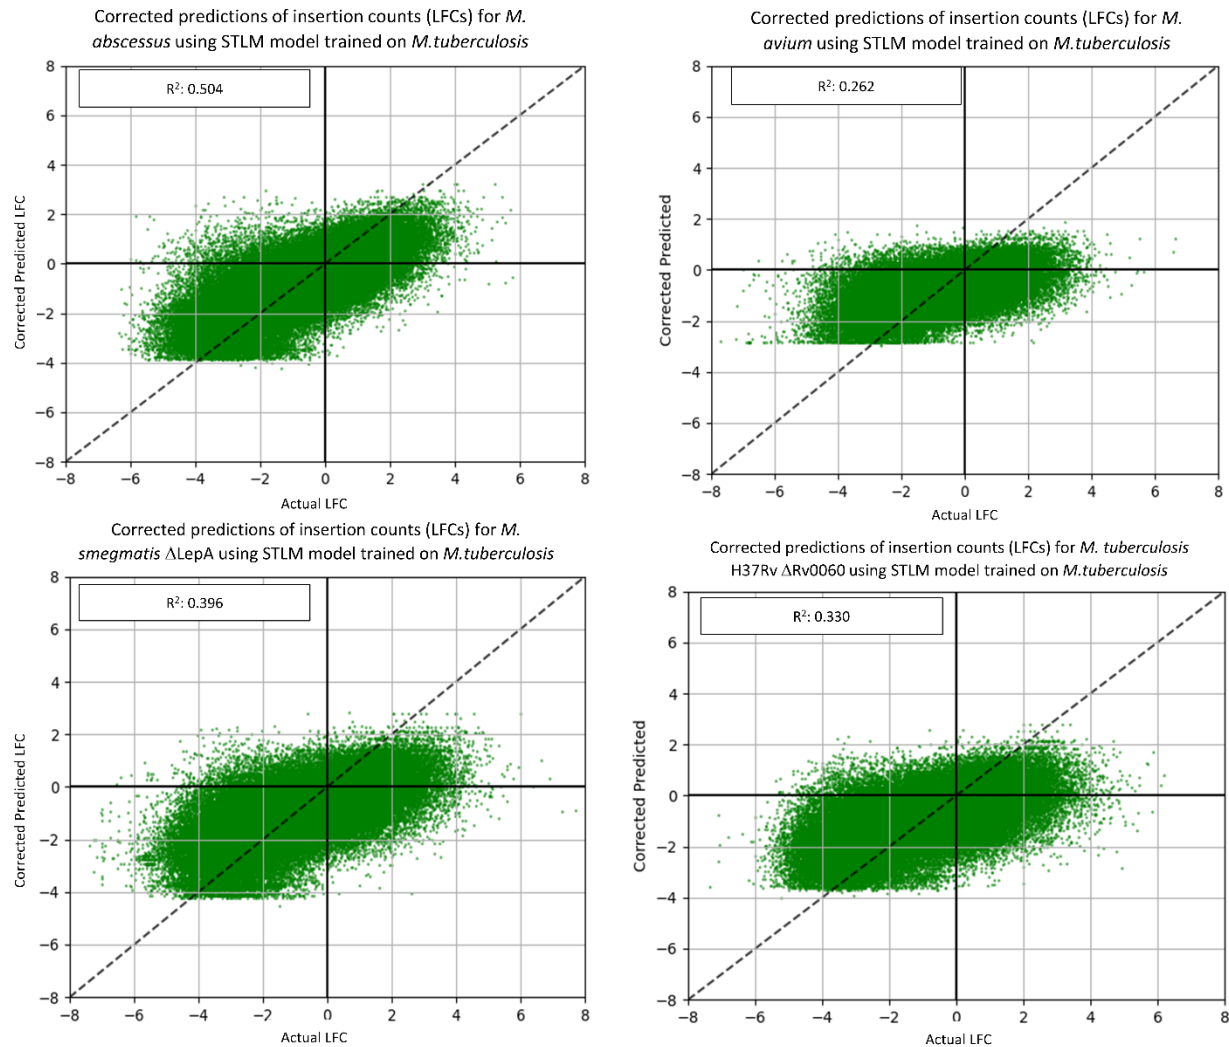

965

966

967

968 **Supplemental Figure S7: Predictive Power of STLM on non-Mycobacterial Datasets.**

969 The predictive power of the STLM on non-Mycobacterial datasets have been more varied than the  
970 Mycobacterial datasets. *Caulobacter* has a high  $R^2$  value, whereas *Vibrio* has quite a low  $R^2$  value.  
971 However, a  $R^2$  value greater than 0.10 for nearly all the datasets indicates that the nucleotide biases  
972 explain at least *some* of the variance in insertion counts with nucleotide biases.  
973

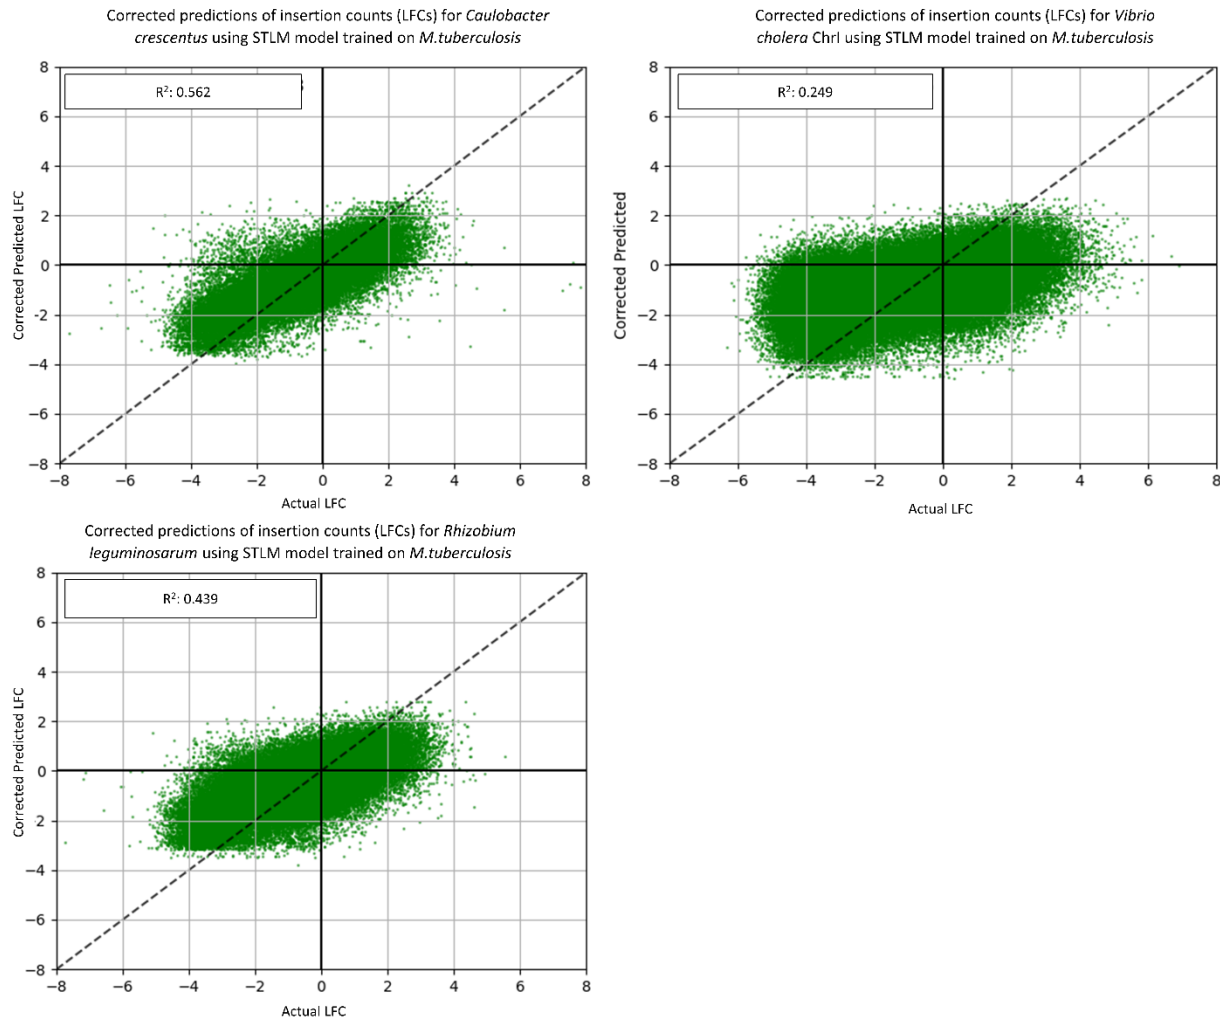

974  
975  
976
